# Supplementary material for: Metal-free synthesis of unsymmetric bis(thioesters)
Source: Royal Society of Chemistry journal article supplement (doi:10.1039/d2cc05160e), 2023-01-01
Supplement: d2cc05160e1.pdf [file d2cc05160e1.pdf]

*Supporting Information*

*for*

**Metal-free synthesis of unsymmetric bis(thioesters)**

Małgorzata Bołt,<sup>a</sup> Aleksandra Mermela,<sup>a</sup> Kamil Hanek<sup>a</sup> and Patrycja Żak<sup>a,\*</sup>

<sup>a</sup> *Department of Organometallic Chemistry, Faculty of Chemistry, Adam Mickiewicz University in Poznań, Umultowska 89b, 61-614 Poznań, Poland*

**CONTENTS:**

|    |                                                                                       |      |
|----|---------------------------------------------------------------------------------------|------|
| 1. | General methods and chemicals                                                         | S-2  |
| 2. | Unsymmetric thioesterification of $\alpha,\beta$ -unsaturated aldehydes with dithiols | S-2  |
| 3. | General procedure for the synthesis of bis(thioesters)                                | S-3  |
| 4. | Analytical data of isolated products                                                  | S-3  |
| 5. | NMR spectra of isolated products                                                      | S-6  |
| 6. | References                                                                            | S-23 |

## 1. General methods and chemicals

All syntheses and catalytic tests were carried out under dry argon, using standard Schlenk-line and vacuum techniques.  $^1\text{H}$  NMR and  $^{13}\text{C}$  NMR spectra were recorded in  $\text{CD}_2\text{Cl}_2$  or  $\text{CDCl}_3$  on a Varian 400 operating at 402.6 and 101.2 MHz, respectively. GC-MS analyses were performed on a Varian Saturn 2100T equipped with a DB-1 capillary column (30 m in length and 0.25 mm in internal diameter) and an ion trap detector. Mass spectroscopic analyses were performed using Synapt G2-S HDMS (Waters) mass spectrometer equipped with the Electrospray ion source and quadrupole-Time-of-flight mass analyzer with the resolving power FWHM 38000 using methanol as a solvent. The Capillary Voltage was set to 4.5 kV, the sampling was set 40 and the source temperature was 120°C. In the ESI-MS spectra sodiated and potassiated ions were observed as the most abundant ions. Additionally protonated ion were present in some spectra with different intensities. Thin layer chromatography (TLC) was conducted on plates coated with a 250  $\mu\text{m}$  thick silica gel layer and column chromatography was performed on silica gel 60 (70–230 mesh).

NHC carbene precursor was prepared according to literature procedures.<sup>1</sup> All the other reagents were commercially available and used as received. The solvents were dried over  $\text{CaH}_2$  prior to use and stored over 4Å molecular sieves under argon. Dichloromethane was additionally passed through an alumina column and degassed by repeated freeze-pump-thaw cycles.

## 2. Unsymmetric thioesterification of $\alpha,\beta$ -unsaturated aldehydes with dithiols

### Method 1

An oven-dried 5 mL glass reactor equipped with a magnetic stirring bar was charged with NHC carbene **NHC-1** (149.6 mg,  $1.59 \times 10^{-4}$  mol) in the glovebox. Then acetone (0.5 mL), dithiol **T**<sub>1-4</sub> ( $7.94 \times 10^{-4}$  mol), aldehyde **A** ( $7.94 \times 10^{-4}$  mol), aldehyde **B** ( $7.94 \times 10^{-4}$  mol) and internal standard (decane or dodecane, 20  $\mu\text{L}$ ) were added. The reaction mixture was stirred at 40 °C for 24h. Reaction course was monitored by GC-MS.

### Method 2

An oven-dried 5 mL glass reactor equipped with a magnetic stirring bar was charged under argon with NHC carbene precursor **NHC** (155.3 mg,  $1.59 \times 10^{-4}$  mol), KHMDs (38.0 mg,  $1.91 \times 10^{-4}$  mol) and acetone (0.5 mL). The reaction mixture was stirred at RT and after 30 minutes dithiol **T**<sub>1-4</sub> ( $7.94 \times 10^{-4}$  mol), aldehyde **A** ( $7.94 \times 10^{-4}$  mol), aldehyde **B** ( $7.94 \times 10^{-4}$  mol) and internal standard (decane or dodecane, 20  $\mu\text{L}$ ) were added. The reaction mixture was stirred at 40 °C for 24h. Reaction course was monitored by GC-MS.

### 3. General procedure for the synthesis of bis(thioesters) (P1-P17)

A flame-dried glass reactor equipped with a magnetic stirring bar and connected to the gas and vacuum line was charged with the NHC carbene precursor **NHC** (233.5 mg,  $2.39 \times 10^{-4}$  mol), KHMDS (57.1 mg,  $2.86 \times 10^{-4}$  mol) and acetone (1 mL) under argon. After 30 minutes of vigorous stirring the solution at RT, dithiol **T**<sub>1-4</sub> ( $1.19 \times 10^{-3}$  mol) and two various of aldehydes **A**, **B** ( $1.19 \times 10^{-3}$  mol) were added. The reaction mixture was stirred at 40 °C until a full conversion of the substrates was detected by GC-MS. All the products were purified by column chromatography on silica gel using dichloromethane or a 1:1 v/v mixture of *n*-hexane and ethyl acetate as eluents. Evaporation of the solvents afforded analytically pure compounds.

### 4. Analytical data of isolated products

|                                                                                                                                  |                                                                                                                                                                                                                                                                                                                                                                                                                                                                                                                                                                                                                                                                                                                                  |
|----------------------------------------------------------------------------------------------------------------------------------|----------------------------------------------------------------------------------------------------------------------------------------------------------------------------------------------------------------------------------------------------------------------------------------------------------------------------------------------------------------------------------------------------------------------------------------------------------------------------------------------------------------------------------------------------------------------------------------------------------------------------------------------------------------------------------------------------------------------------------|
| 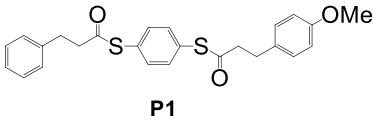 <p style="text-align: center;"><b>P1</b></p>   | <sup>1</sup> H NMR (400 MHz, CDCl <sub>3</sub> , ppm): 2.94-3.04 (m, 8H, CH <sub>2</sub> ), 3.80 (s, 3H, OCH <sub>3</sub> ), 6.84-6.87 (m, 2H, Ph), 7.11-7.15 (m, 2H, Ph), 7.21-7.25 (m, 3H, Ph), 7.30-7.34 (m, 2H, Ph), 7.42 (s, 4H, -S-C <sub>6</sub> H <sub>4</sub> -S-); <sup>13</sup> C NMR (100 MHz, CDCl <sub>3</sub> , ppm): 30.50 (CH <sub>2</sub> ), 31.31 (CH <sub>2</sub> ), 45.22 (CH <sub>2</sub> ), 45.54 (CH <sub>2</sub> ), 55.22 (OCH <sub>3</sub> ), 113.95, 126.43, 128.33, 128.55, 129.30, 131.76, 134.70, 139.72, 158.18, 195.69 (CO), 195.77 (CO); MS (ESI+): m/z 456 [M <sup>+</sup> +Na].                                                                                                               |
| 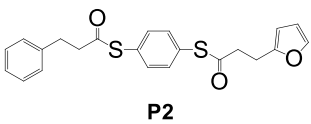 <p style="text-align: center;"><b>P2</b></p> | <sup>1</sup> H NMR (400 MHz, CD <sub>2</sub> Cl <sub>2</sub> , ppm): 2.96-3.03 (m, 8H, CH <sub>2</sub> ), 6.04-6.09 (m, 1H, CH from furan), 6.27-6.33 (m, 1H, CH from furan), 7.19-7.23 (m, 3H, Ph and furane), 7.28-7.34 (m, 3H, Ph), 7.39-7.77 (m, 4H, Ph); <sup>13</sup> C NMR (100 MHz, CD <sub>2</sub> Cl <sub>2</sub> , ppm): 24.01 (CH <sub>2</sub> ), 31.61 (CH <sub>2</sub> ), 42.22 (CH <sub>2</sub> ), 45.55 (CH <sub>2</sub> ), 106.03, 110.60, 126.71, 128.71, 128.85, 135.22, 135.23, 140.32, 141.73, 153.86, 195.73 (CO), 196.11 (CO); MS (ESI+): m/z 419 [M <sup>+</sup> +Na].                                                                                                                                   |
| 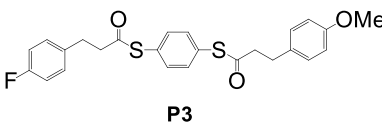 <p style="text-align: center;"><b>P3</b></p> | <sup>1</sup> H NMR (400 MHz, CD <sub>2</sub> Cl <sub>2</sub> , ppm): 2.92-2.99 (m, 8H, CH <sub>2</sub> ), 3.76 (s, 3H, OCH <sub>3</sub> ), 6.81-6.85 (m, 3H, Ph), 6.97-7.02 (m, 1H, Ph), 7.10-7.14 (m, 3H, Ph), 7.17-7.21 (m, 1H, Ph), 7.38-7.44 (m, 4H, Ph); <sup>13</sup> C NMR (100 MHz, CD <sub>2</sub> Cl <sub>2</sub> , ppm): 30.79 (CH <sub>2</sub> ), 30.81 (CH <sub>2</sub> ), 45.55 (CH <sub>2</sub> ), 45.87 (CH <sub>2</sub> ), 55.52 (OCH <sub>3</sub> ), 114.17, 115.52 (d, J = 21.3 Hz), 129.67, 130.28 (d, J = 7.9 Hz), 132.24, 135.21, 158.61, 161.89 (d, J = 243.5 Hz), 196.03 (CO), 196.22 (CO); MS (ESI+): m/z 477 [M <sup>+</sup> +Na].                                                                     |
| 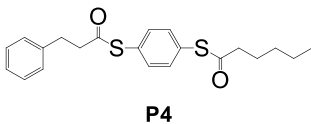 <p style="text-align: center;"><b>P4</b></p> | <sup>1</sup> H NMR (400 MHz, CD <sub>2</sub> Cl <sub>2</sub> , ppm): 0.89-0.93 (m, 3H, CH <sub>3</sub> ), 1.31-1.38 (m, 4H, CH <sub>2</sub> ), 1.67-1.74 (m, 2H, CH <sub>2</sub> ), 2.64-2.69 (m, 2H, CH <sub>2</sub> ), 2.93-3.07 (m, 4H, CH <sub>2</sub> ), 7.18-7.25 (m, 3H, Ph), 7.28-7.33 (m, 2H, Ph), 7.37-7.48 (m, 4H, Ph); <sup>13</sup> C NMR (100 MHz, CD <sub>2</sub> Cl <sub>2</sub> , ppm): 14.0 (CH <sub>3</sub> ), 22.66 (CH <sub>2</sub> ), 25.59 (CH <sub>2</sub> ), 31.40 (CH <sub>2</sub> ), 31.61 (CH <sub>2</sub> ), 44.15 (CH <sub>2</sub> ), 45.55 (CH <sub>2</sub> ), 126.71, 127.63, 128.71, 128.84, 135.18, 135.22, 135.41, 140.32, 196.10 (CO), 196.92 (CO); MS (ESI+): m/z 395 [M <sup>+</sup> +Na]. |

|                                                                                                                                   |                                                                                                                                                                                                                                                                                                                                                                                                                                                                                                                                                                                                                                                                                                                                                                   |
|-----------------------------------------------------------------------------------------------------------------------------------|-------------------------------------------------------------------------------------------------------------------------------------------------------------------------------------------------------------------------------------------------------------------------------------------------------------------------------------------------------------------------------------------------------------------------------------------------------------------------------------------------------------------------------------------------------------------------------------------------------------------------------------------------------------------------------------------------------------------------------------------------------------------|
| 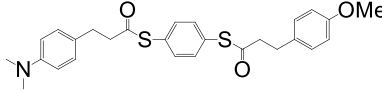 <p style="text-align: center;"><b>P5</b></p>    | <sup>1</sup> H NMR (400 MHz, CD <sub>2</sub> Cl <sub>2</sub> , ppm): 2.90 (s, 6H, NCH <sub>3</sub> ), 2.91-2.97 (m, 8H, CH <sub>2</sub> ), 3.77 (s, 3H, OCH <sub>3</sub> ), 6.68 (d, 2H, J <sub>HH</sub> = 8.7 Hz, Ph), 6.84 (d, 2H, J <sub>HH</sub> = 8.7 Hz, Ph), 7.07 (d, 2H, J <sub>HH</sub> = 8.7 Hz, Ph), 7.13 (d, 2H, J <sub>HH</sub> = 8.7 Hz, Ph), 7.42 (br s, 4H, Ph); <sup>13</sup> C NMR (100 MHz, CD <sub>2</sub> Cl <sub>2</sub> , ppm): 30.81 (br s, CH <sub>2</sub> ), 40.87 (NCH <sub>3</sub> ), 45.86 (CH <sub>2</sub> ), 46.13 (CH <sub>2</sub> ), 55.50 (OCH <sub>3</sub> ), 113.12, 114.17, 129.23, 129.75, 132.24, 135.19, 135.22, 149.82, 158.60, 196.23 (CO), 196.37 (CO); MS (ESI <sup>+</sup> ): m/z 502 [M <sup>+</sup> +Na].          |
| 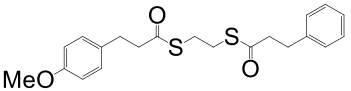 <p style="text-align: center;"><b>P6</b></p>    | <sup>1</sup> H NMR (400 MHz, CD <sub>2</sub> Cl <sub>2</sub> , ppm): 2.80-2.90 (m, 6H, CH <sub>2</sub> ), 2.93-2.96 (m, 2H, CH <sub>2</sub> ), 3.01 (s, 4H, SCH <sub>2</sub> ), 3.75 (s, 3H, OCH <sub>3</sub> ), 6.78-6.82 (m, 2H, Ph), 7.07-7.10 (m, 2H, Ph), 7.17-7.21 (m, 3H, Ph), 7.24-7.30 (m, 2H, Ph); <sup>13</sup> C NMR (100 MHz, CD <sub>2</sub> Cl <sub>2</sub> , ppm): 29.05 (CH <sub>2</sub> ), 29.09 (CH <sub>2</sub> ), 30.76 (CH <sub>2</sub> ), 31.57 (CH <sub>2</sub> ), 46.70 (CH <sub>2</sub> ), 46.01 (CH <sub>2</sub> ), 55.49 (OCH <sub>3</sub> ), 114.10, 126.60, 128.28, 128.64, 128.73, 128.78, 129.58, 132.40, 140.49, 158.51, 197.99 (CO), 198.08 (CO); MS (ESI <sup>+</sup> ): m/z 429 [M <sup>+</sup> +K].                          |
| 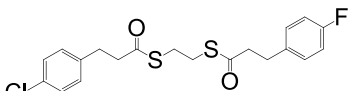 <p style="text-align: center;"><b>P7</b></p>   | <sup>1</sup> H NMR (400 MHz, CD <sub>2</sub> Cl <sub>2</sub> , ppm): 2.82-2.86 (m, 4H, CH <sub>2</sub> ), 2.91-2.96 (m, 4H, CH <sub>2</sub> ), 3.00 (s, 4H, SCH <sub>2</sub> ), 6.92-7.01 (m, 2H, Ph), 7.11-7.17 (m, 4H, Ph), 7.23-7.26 (m, 2H, Ph); <sup>13</sup> C NMR (100 MHz, CD <sub>2</sub> Cl <sub>2</sub> , ppm): 20.09 (CH <sub>2</sub> ), 30.76 (CH <sub>2</sub> ), 30.87 (CH <sub>2</sub> ), 45.39 (CH <sub>2</sub> ), 45.66 (CH <sub>2</sub> ), 111.35, 115.56, 128.84, 130.16, 130.23, 132.26, 136.24 (d, J = 3.1 Hz), 139.07, 160.62, 163.04, 197.74 (CO), 197.83 (CO); MS (ESI <sup>+</sup> ): m/z 433 [M <sup>+</sup> +Na].                                                                                                                      |
| 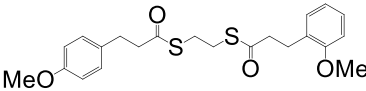 <p style="text-align: center;"><b>P8</b></p>  | <sup>1</sup> H NMR (400 MHz, CD <sub>2</sub> Cl <sub>2</sub> , ppm): 2.80-2.85 (m, 4H, CH <sub>2</sub> ), 2.88-2.95 (m, 4H, CH <sub>2</sub> ), 3.00 (s, 4H, SCH <sub>2</sub> ), 3.75 (s, 3H, OCH <sub>3</sub> ), 3.81 (s, 3H, OCH <sub>3</sub> ), 6.79-6.86 (m, 4H, Ph), 7.07-7.11 (m, 3H, Ph), 7.16-7.21 (m, 1H, Ph); <sup>13</sup> C NMR (100 MHz, CD <sub>2</sub> Cl <sub>2</sub> , ppm): 26.85 (CH <sub>2</sub> ), 29.07 (CH <sub>2</sub> ), 30.77 (CH <sub>2</sub> ), 33.16 (CH <sub>2</sub> ), 44.06 (CH <sub>2</sub> ), 46.01 (CH <sub>2</sub> ), 55.49 (br s, OCH <sub>3</sub> ), 110.56, 114.12, 120.65, 128.01, 128.58, 129.58, 130.21, 132.40, 157.85, 158.83, 198.06 (CO), 198.34 (CO); MS (ESI <sup>+</sup> ): m/z 457 [M <sup>+</sup> +K].          |
| 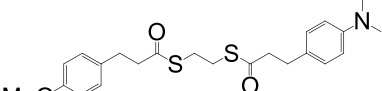 <p style="text-align: center;"><b>P9</b></p>  | <sup>1</sup> H NMR (400 MHz, CD <sub>2</sub> Cl <sub>2</sub> , ppm): 2.78-2.86 (m, 8H, CH <sub>2</sub> ), 2.89 (s, 6H, NCH <sub>3</sub> ), 3.00-3.02 (m, 4H, SCH <sub>2</sub> ), 3.82 (s, 3H, OCH <sub>3</sub> ), 6.64-6.67 (m, 2H, Ph), 6.83-6.88 (m, 2H, Ph), 7.02-7.04 (m, 2H, Ph), 7.09-7.13 (m, 1H, Ph), 7.17-7.21 (m, 1H, Ph); <sup>13</sup> C NMR (100 MHz, CD <sub>2</sub> Cl <sub>2</sub> , ppm): 26.86 (CH <sub>2</sub> ), 29.09 (CH <sub>2</sub> ), 30.75 (CH <sub>2</sub> ), 40.86 (NCH <sub>3</sub> ), 44.07 (CH <sub>2</sub> ), 46.27 (CH <sub>2</sub> ), 55.50 (OCH <sub>3</sub> ), 110.55, 113.08, 120.64, 128.01, 128.17, 128.59, 129.15, 130.21, 149.76, 157.85, 198.25 (CO), 198.35 (CO); MS (ESI <sup>+</sup> ): m/z 433 [M <sup>+</sup> +H]. |
| 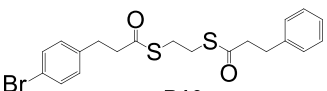 <p style="text-align: center;"><b>P10</b></p> | <sup>1</sup> H NMR (400 MHz, CD <sub>2</sub> Cl <sub>2</sub> , ppm): 2.83-2.98 (m, 8H, CH <sub>2</sub> ), 2.99-3.05 (m, 4H, CH <sub>2</sub> ), 7.06-7.21 (m, 5H, Ph), 7.25-7.42 (m, 4H, Ph); <sup>13</sup> C NMR (100 MHz, CD <sub>2</sub> Cl <sub>2</sub> , ppm): 29.07 (CH <sub>2</sub> ), 30.90 (CH <sub>2</sub> ), 31.55 (CH <sub>2</sub> ), 45.29 (CH <sub>2</sub> ), 45.68 (CH <sub>2</sub> ), 120.29, 120.60, 128.63, 128.77, 130.54, 131.79, 139.55, 140.47, 197.69 (CO), 197.94 (CO); MS (ESI <sup>+</sup> ): m/z 477 [M <sup>+</sup> +K].                                                                                                                                                                                                               |

|                                                                                                                                   |                                                                                                                                                                                                                                                                                                                                                                                                                                                                                                                                                                                                                                                                                                                                                                                                                                                                    |
|-----------------------------------------------------------------------------------------------------------------------------------|--------------------------------------------------------------------------------------------------------------------------------------------------------------------------------------------------------------------------------------------------------------------------------------------------------------------------------------------------------------------------------------------------------------------------------------------------------------------------------------------------------------------------------------------------------------------------------------------------------------------------------------------------------------------------------------------------------------------------------------------------------------------------------------------------------------------------------------------------------------------|
| 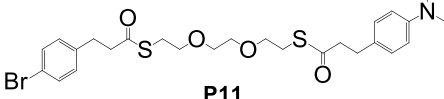 <p style="text-align: center;"><b>P11</b></p>   | <sup>1</sup> H NMR (400 MHz, CD <sub>2</sub> Cl <sub>2</sub> , ppm): 2.50-2.87, 3.03-3.12 (m, 12H, CH <sub>2</sub> ), 2.91 (s, 6H, NCH <sub>3</sub> ), 3.50-3.60 (m, 8H, CH <sub>2</sub> ), 6.69-6.76 (m, 2H, Ph), 7.00-7.17 (m, 4H, Ph), 7.33-7.56 (m, 2H, Ph); <sup>13</sup> C NMR (100 MHz, CD <sub>2</sub> Cl <sub>2</sub> , ppm): 24.79 (CH <sub>2</sub> ), 29.08 (CH <sub>2</sub> ), 29.18 (CH <sub>2</sub> ), 30.96 (CH <sub>2</sub> ), 31.15 (CH <sub>2</sub> ), 41.43 (NCH <sub>3</sub> ), 45.46 (CH <sub>2</sub> ), 46.33 (CH <sub>2</sub> ), 70.23 (CH <sub>2</sub> O), 70.71 (CH <sub>2</sub> O), 113.83, 120.43, 129.42, 130.73, 131.95, 139.82, 149.38, 198.21 (CO), 198.70 (CO); MS (ESI <sup>+</sup> ): m/z 569 [M <sup>+</sup> +H].                                                                                                               |
| 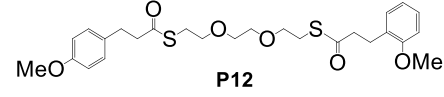 <p style="text-align: center;"><b>P12</b></p>   | <sup>1</sup> H NMR (400 MHz, CD <sub>2</sub> Cl <sub>2</sub> , ppm): 2.82-2.96 (m, 8H, CH <sub>2</sub> ), 3.04-3.10 (m, 4H, CH <sub>2</sub> ), 3.53-3.59 (m, 8H, CH <sub>2</sub> ), 3.76 (s, 3H, OCH <sub>3</sub> ), 3.82 (s, 3H, OCH <sub>3</sub> ), 6.80-6.88 (m, 4H, Ph), 7.08-7.13 (m, 3H, Ph), 7.16-7.22 (m, 1H, Ph); <sup>13</sup> C NMR (100 MHz, CD <sub>2</sub> Cl <sub>2</sub> , ppm): 26.84 (CH <sub>2</sub> ), 28.81 (CH <sub>2</sub> ), 28.88 (CH <sub>2</sub> ), 30.77 (CH <sub>2</sub> ), 44.04 (CH <sub>2</sub> ), 45.96 (CH <sub>2</sub> ), 55.42 (br s, OCH <sub>3</sub> ), 70.00 (CH <sub>2</sub> O), 70.06 (CH <sub>2</sub> O), 70.50 (CH <sub>2</sub> O), 110.50, 114.06, 120.60, 127.95, 128.59, 129.54, 130.15, 132.42, 157.79, 158.45, 198.31 (CO), 198.60 (CO); MS (ESI <sup>+</sup> ): m/z 529 [M <sup>+</sup> +Na].                     |
| 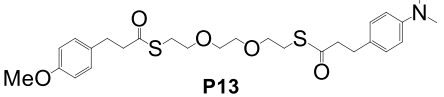 <p style="text-align: center;"><b>P13</b></p>  | <sup>1</sup> H NMR (400 MHz, CD <sub>2</sub> Cl <sub>2</sub> , ppm): 2.78-2.89 (m, 6H, CH <sub>2</sub> ), 2.90 (s, 6H, NCH <sub>3</sub> ), 3.06-3.10 (m, 4H, CH <sub>2</sub> ), 3.50-3.63 (m, 10H, CH <sub>2</sub> ), 3.76 (s, 3H, OCH <sub>3</sub> ), 6.67-6.70 (m, 1H, Ph), 6.82-6.84 (m, 2H, Ph), 7.02-7.09 (m, 2H, Ph), 7.10-7.14 (m, 3H, Ph); <sup>13</sup> C NMR (100 MHz, CD <sub>2</sub> Cl <sub>2</sub> , ppm): 26.86 (CH <sub>2</sub> ), 28.89 (CH <sub>2</sub> ), 30.75 (CH <sub>2</sub> ), 30.78 (CH <sub>2</sub> ), 40.93 (NCH <sub>3</sub> ), 45.98 (CH <sub>2</sub> ), 46.21 (CH <sub>2</sub> ), 55.43 (OCH <sub>3</sub> ), 70.01 (CH <sub>2</sub> O), 70.04 (CH <sub>2</sub> O), 70.51 (CH <sub>2</sub> O), 113.18, 114.07, 129.15, 129.55, 129.58, 132.44, 158.46, 198.34 (CO), 198.51 (CO); MS (ESI <sup>+</sup> ): m/z 520 [M <sup>+</sup> +H]. |
| 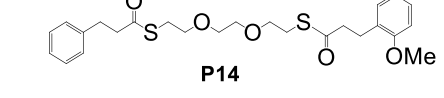 <p style="text-align: center;"><b>P14</b></p> | <sup>1</sup> H NMR (400 MHz, CD <sub>2</sub> Cl <sub>2</sub> , ppm): 2.82-2.89 (m, 4H, CH <sub>2</sub> ), 2.91-2.98 (m, 4H, CH <sub>2</sub> ), 3.04-3.08 (m, 4H, CH <sub>2</sub> ), 3.52-3.57 (m, 8H, CH <sub>2</sub> ), 3.82 (s, 3H, OCH <sub>3</sub> ), 6.82-6.87 (m, 2H, Ph), 7.08-7.12 (m, 1H, Ph), 7.16-7.21 (m, 4H, Ph), 7.25-7.29 (m, 2H, Ph); <sup>13</sup> C NMR (100 MHz, CD <sub>2</sub> Cl <sub>2</sub> , ppm): 26.86 (CH <sub>2</sub> ), 26.83 (CH <sub>2</sub> ), 28.92 (CH <sub>2</sub> ), 31.60 (CH <sub>2</sub> ), 44.03 (CH <sub>2</sub> ), 45.67 (CH <sub>2</sub> ), 55.47 (OCH <sub>3</sub> ), 70.01 (CH <sub>2</sub> O), 70.08 (CH <sub>2</sub> O), 70.53 (CH <sub>2</sub> O), 110.52, 120.61, 126.56, 127.96, 128.62, 128.75, 130.17, 140.54, 157.82, 198.24 (CO), 198.62 (CO); MS (ESI <sup>+</sup> ): 499 [M <sup>+</sup> +Na].            |
| 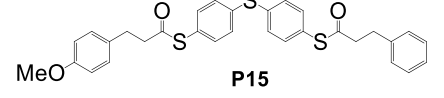 <p style="text-align: center;"><b>P15</b></p> | <sup>1</sup> H NMR (400 MHz, CDCl <sub>3</sub> , ppm): 2.91-2.94 (m, 4H, CH <sub>2</sub> ), 2.94-3.03 (m, 4H, CH <sub>2</sub> ), 3.76 (s, 3H, OCH <sub>3</sub> ), 6.81-6.84 (m, 2H, Ph), 7.10-7.13 (m, 2H, Ph), 7.17-7.23 (m, 4H, Ph), 7.26-7.33 (m, 6H, Ph), 7.36-7.39 (m, 3H, Ph); <sup>13</sup> C NMR (100 MHz, CDCl <sub>3</sub> , ppm): 30.80 (CH <sub>2</sub> ), 31.60 (CH <sub>2</sub> ), 45.43 (CH <sub>2</sub> ), 45.75 (CH <sub>2</sub> ), 55.51 (OCH <sub>3</sub> ), 114.15, 126.69, 127.36, 127.42, 128.69, 128.83, 129.64, 130.54, 131.70, 132.26, 133.06, 135.45, 135.55, 137.26, 137.33, 140.35, 158.59, 196.47 (CO), 196.55 (CO); MS (ESI <sup>+</sup> ): m/z 567 [M <sup>+</sup> +Na].                                                                                                                                                            |

|                                                                                                                                 |                                                                                                                                                                                                                                                                                                                                                                                                                                                                                                                                                                                                                                                                                                                                                                                                                         |
|---------------------------------------------------------------------------------------------------------------------------------|-------------------------------------------------------------------------------------------------------------------------------------------------------------------------------------------------------------------------------------------------------------------------------------------------------------------------------------------------------------------------------------------------------------------------------------------------------------------------------------------------------------------------------------------------------------------------------------------------------------------------------------------------------------------------------------------------------------------------------------------------------------------------------------------------------------------------|
| 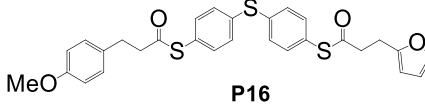 <p style="text-align: center;"><b>P16</b></p> | <sup>1</sup> H NMR (400 MHz, CD <sub>2</sub> Cl <sub>2</sub> , ppm): 2.89-2.98 (m, 4H, CH <sub>2</sub> ), 2.99-3.07 (m, 4H, CH <sub>2</sub> ), 3.77 (s, 3H, OCH <sub>3</sub> ), 6.07 (dd, 1H, <i>J</i> <sub>HH</sub> = 3.2, 0.7 Hz, CH from furan), 6.30 (dd, 1H, <i>J</i> <sub>HH</sub> = 3.2, 1.9 Hz, CH from furan), 6.79-6.88 (m, 2H, Ph), 7.10-7.16 (m, 2H, Ph and furane), 7.30-7.40 (m, 8H, Ph); <sup>13</sup> C NMR (100 MHz, CD <sub>2</sub> Cl <sub>2</sub> , ppm): 23.97 (CH <sub>2</sub> ), 30.78 (CH <sub>2</sub> ), 42.08 (CH <sub>2</sub> ), 45.73 (CH <sub>2</sub> ), 55.50 (OCH <sub>3</sub> ), 105.98, 110.59, 114.14, 127.17, 127.41, 129.63, 131.68, 131.71, 132.24, 135.54, 137.27, 141.70, 153.88, 158.58, 196.06 (CO), 196.51 (CO); MS (ESI <sup>+</sup> ): <i>m/z</i> 557 [M <sup>+</sup> +Na]. |
| 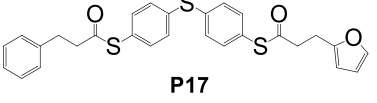 <p style="text-align: center;"><b>P17</b></p> | <sup>1</sup> H NMR (400 MHz, CD <sub>2</sub> Cl <sub>2</sub> , ppm): 2.98-3.03 (m, 8H, CH <sub>2</sub> ), 6.07 (dd, 1H, <i>J</i> <sub>HH</sub> = 3.2, 0.7 Hz, CH from furan), 6.31 (dd, 1H, <i>J</i> <sub>HH</sub> = 3.2, 1.9 Hz, CH from furan), 7.21-7.23 (m, 2H, Ph and furane), 7.27-7.43 (m, 12H, Ph); <sup>13</sup> C NMR (100 MHz, CD <sub>2</sub> Cl <sub>2</sub> , ppm): 23.98 (CH <sub>2</sub> ), 31.59 (CH <sub>2</sub> ), 42.09 (CH <sub>2</sub> ), 45.42 (CH <sub>2</sub> ), 105.99, 110.59, 126.70, 127.21 (d, <i>J</i> = 1.5 Hz), 127.38 (d, <i>J</i> = 1.5 Hz), 128.69, 128.83, 131.71, 135.55, 137.29 (d, <i>J</i> = 3.0 Hz), 137.37 (d, <i>J</i> = 3.0 Hz), 140.33, 141.71, 153.88, 196.06 (CO), 196.43 (CO); MS (ESI <sup>+</sup> ): <i>m/z</i> 527 [M <sup>+</sup> +Na].                            |

## 5. NMR spectra of isolated products

### Product P1

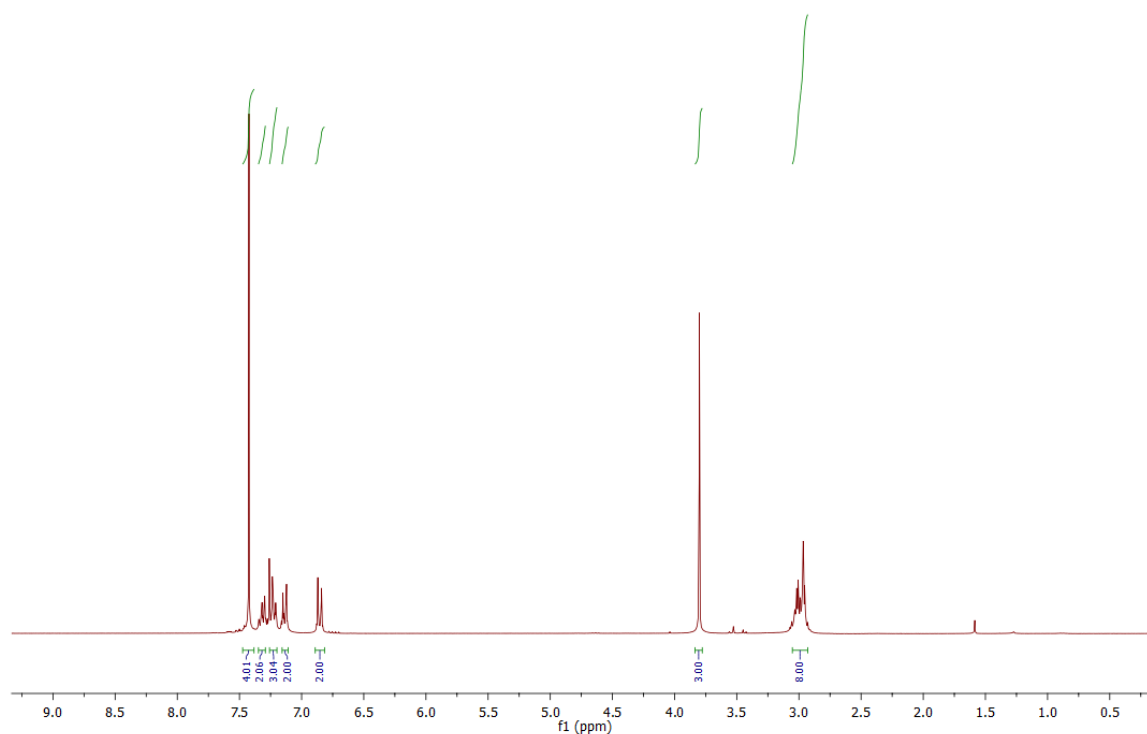

Figure 1. <sup>1</sup>H NMR (400 MHz, CDCl<sub>3</sub>) of **P1**

**Product P1**

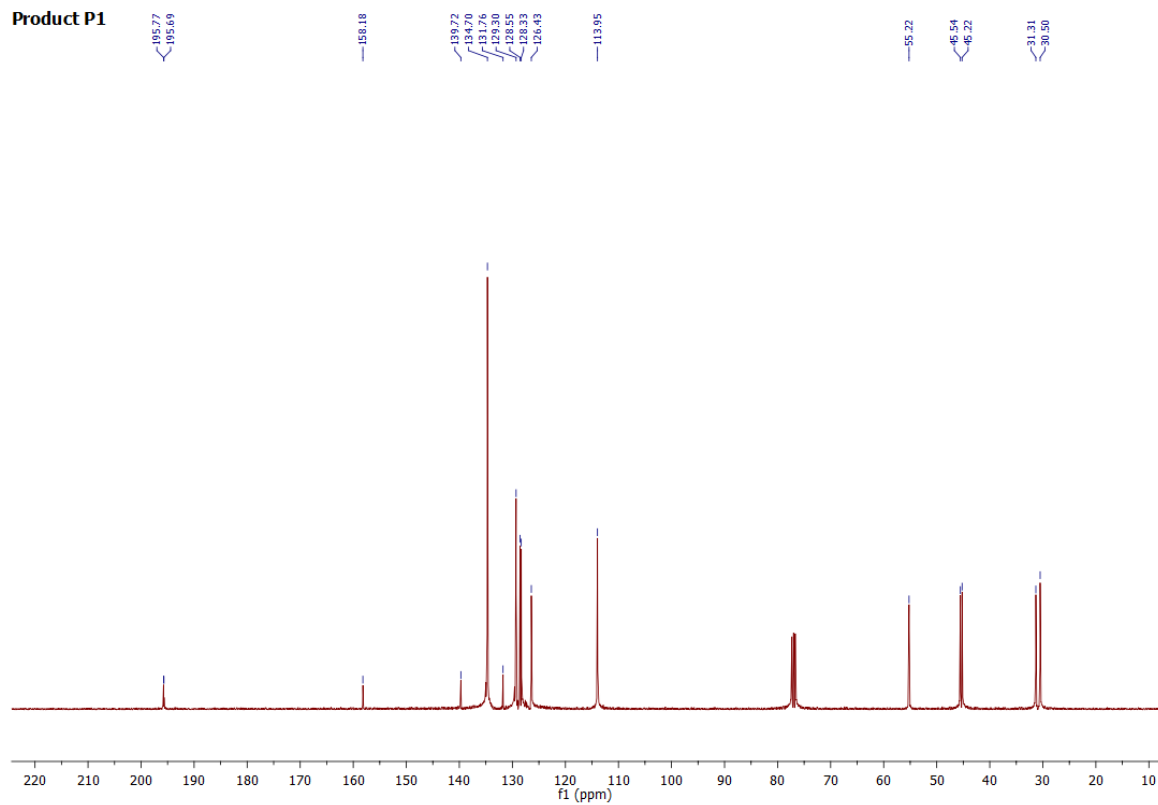

Figure 2.  $^{13}\text{C}$  NMR (100 MHz,  $\text{CDCl}_3$ ) of **P1**

**Product P2**

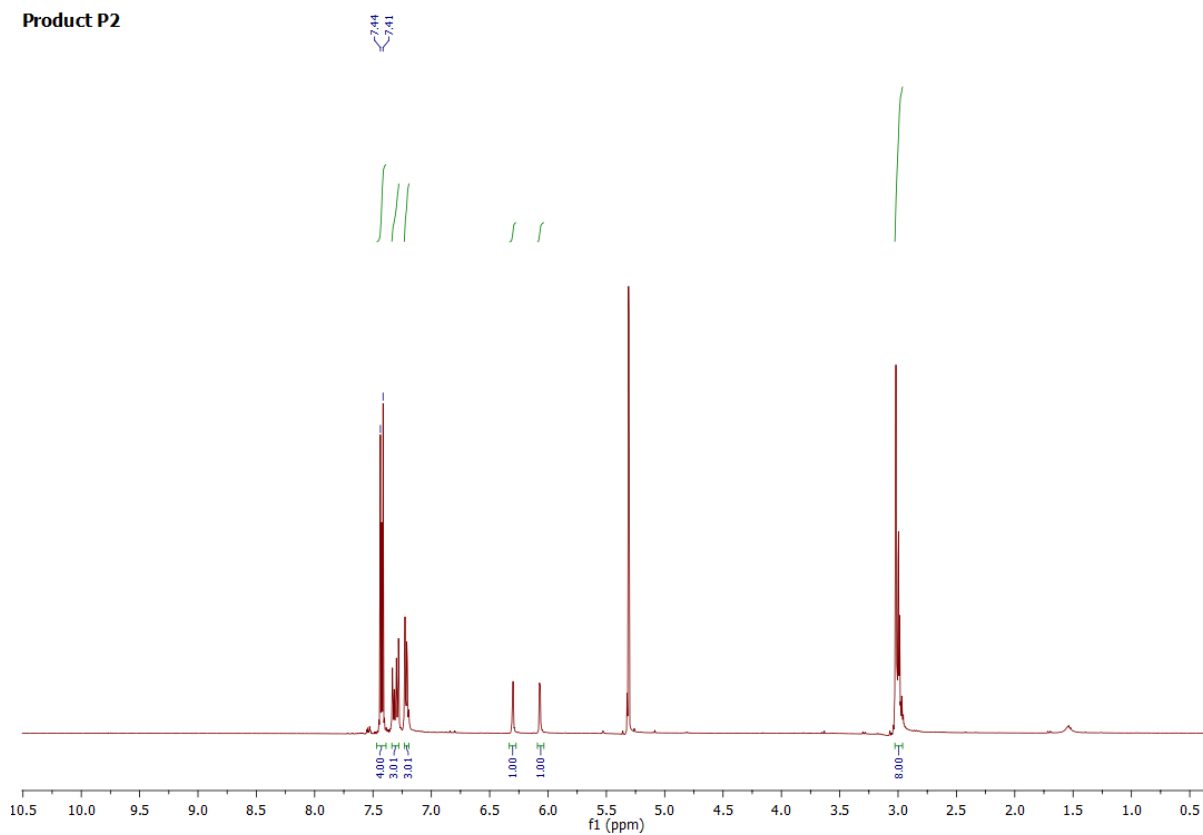

Figure 3.  $^1\text{H}$  NMR (400 MHz,  $\text{CD}_2\text{Cl}_2$ ) of **P2**

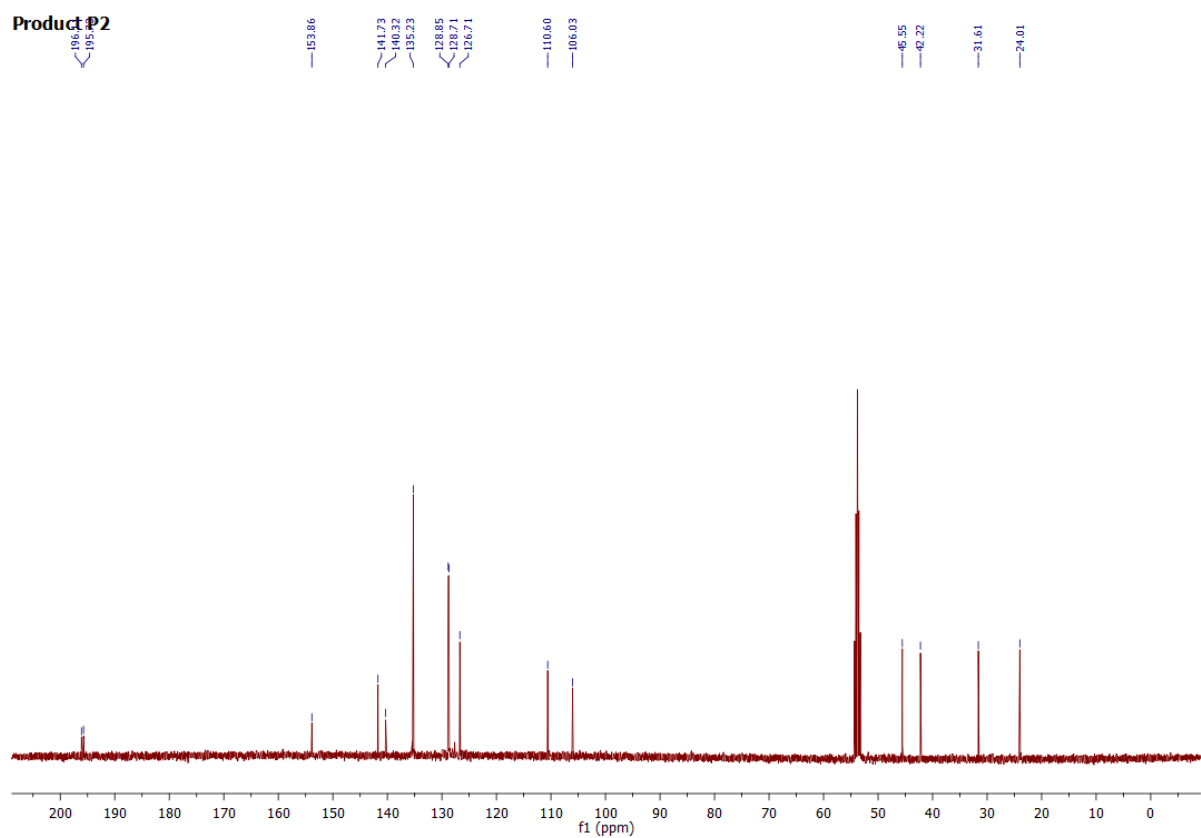

Figure 4.  $^{13}\text{C}$  NMR (100 MHz,  $\text{CD}_2\text{Cl}_2$ ) of **P2**

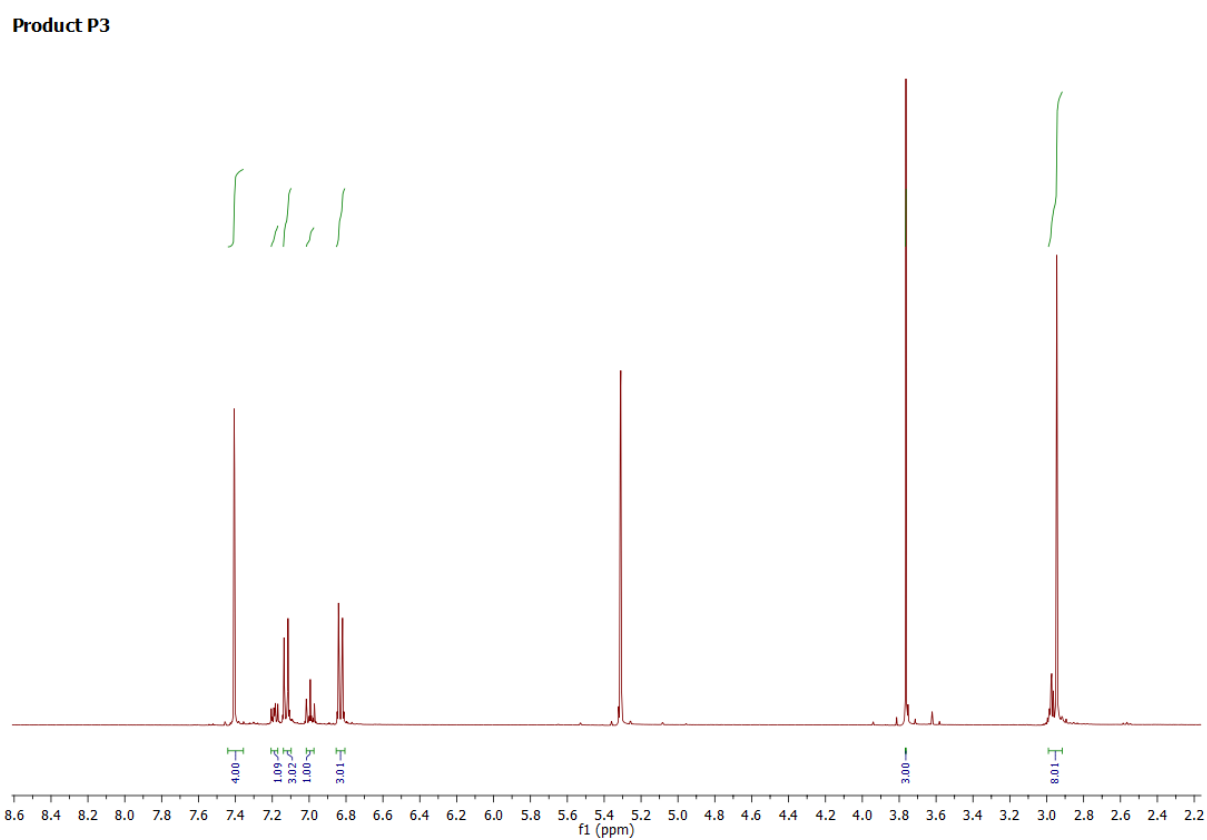

Figure 5.  $^1\text{H}$  NMR (400 MHz,  $\text{CD}_2\text{Cl}_2$ ) of **P3**

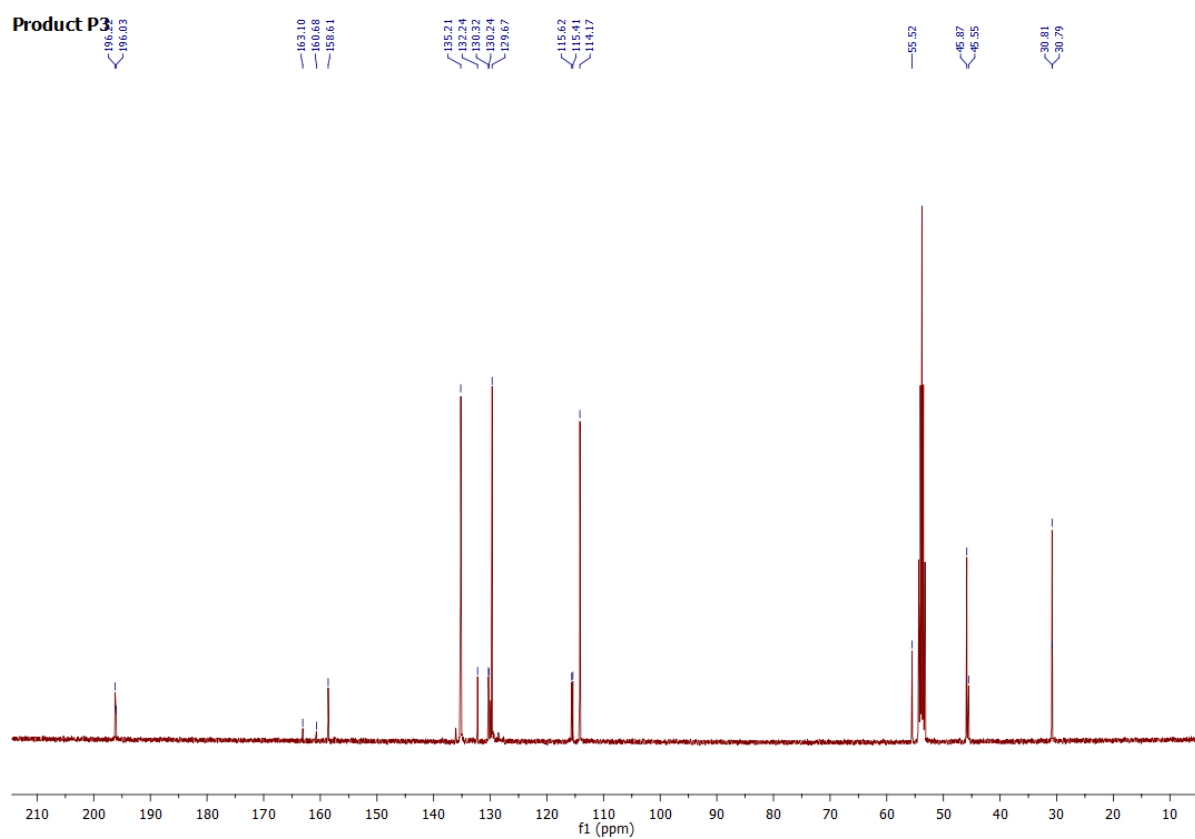

Figure 6.  $^{13}\text{C}$  NMR (100 MHz,  $\text{CD}_2\text{Cl}_2$ ) of **P3**

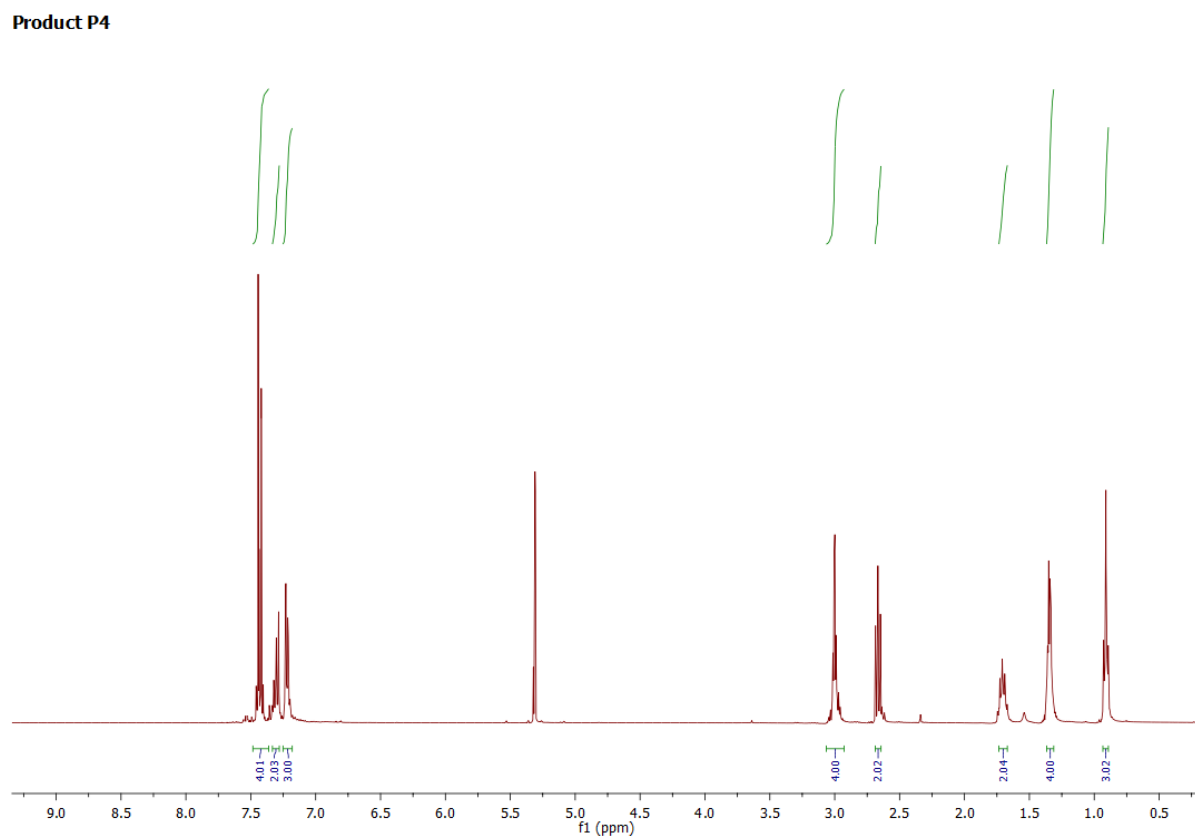

Figure 7.  $^1\text{H}$  NMR (400 MHz,  $\text{CD}_2\text{Cl}_2$ ) of **P4**

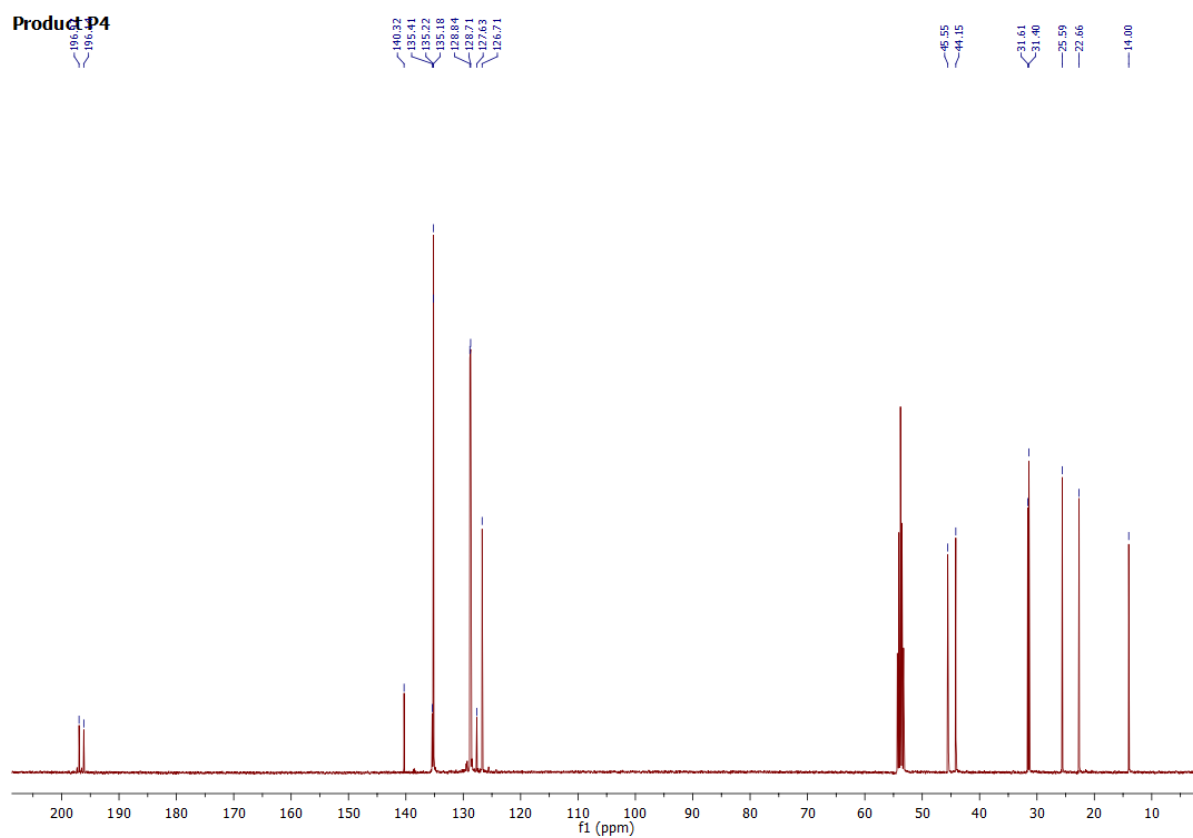

Figure 8.  $^{13}\text{C}$  NMR (100 MHz,  $\text{CD}_2\text{Cl}_2$ ) of **P4**

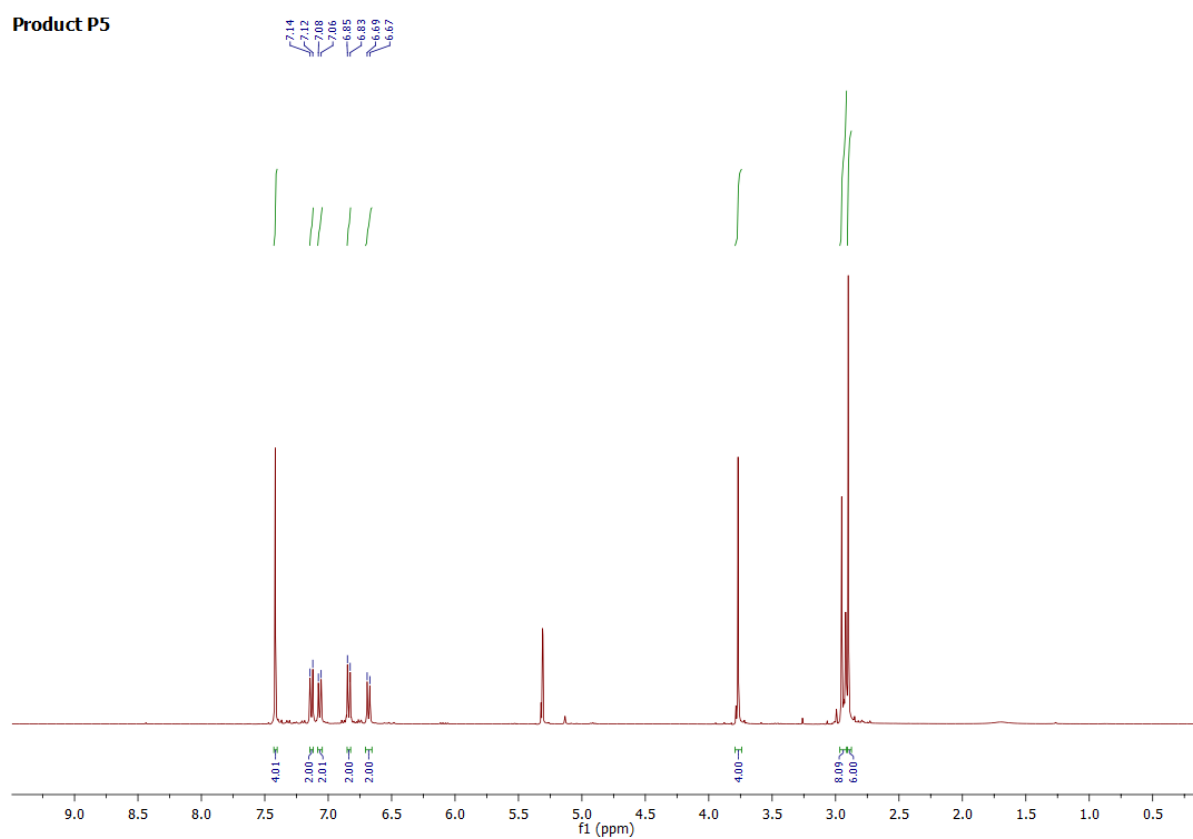

Figure 9.  $^1\text{H}$  NMR (400 MHz,  $\text{CD}_2\text{Cl}_2$ ) of **P5**

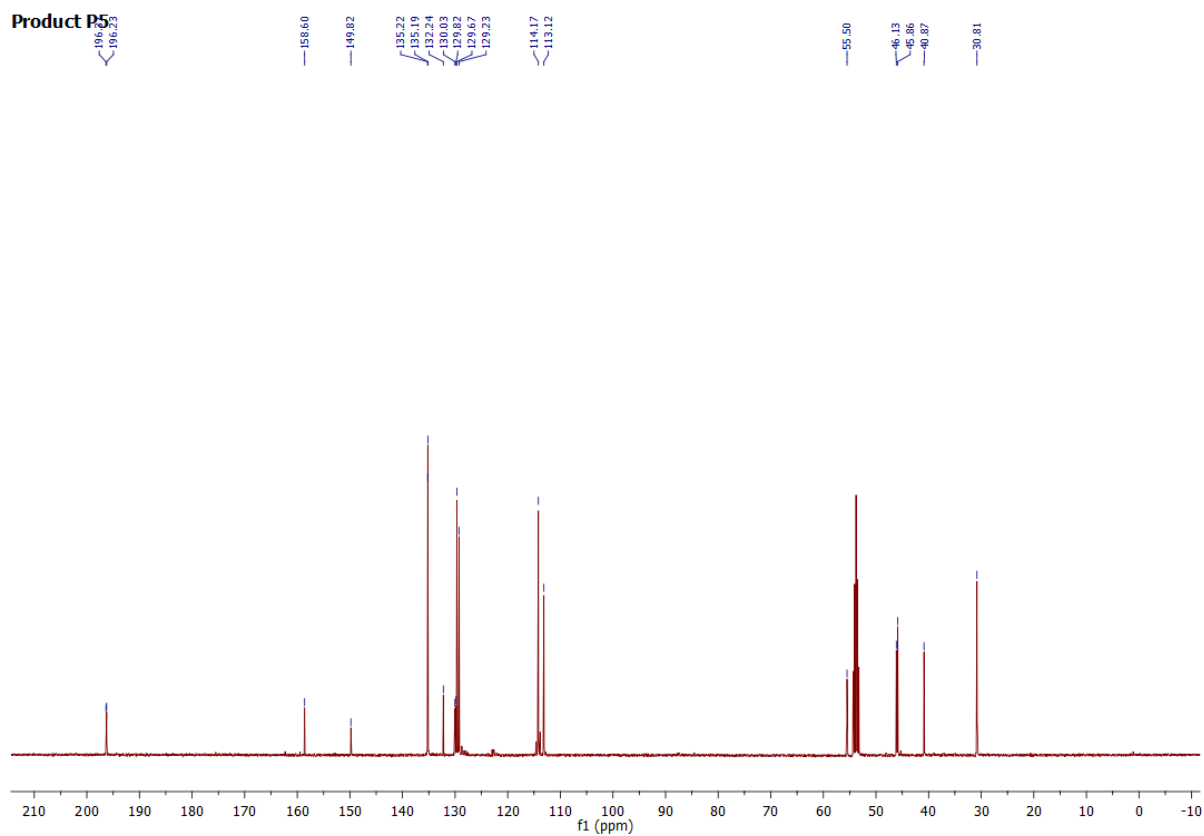

Figure 10.  $^{13}\text{C}$  NMR (100 MHz,  $\text{CD}_2\text{Cl}_2$ ) of **P5**

**Product P6**

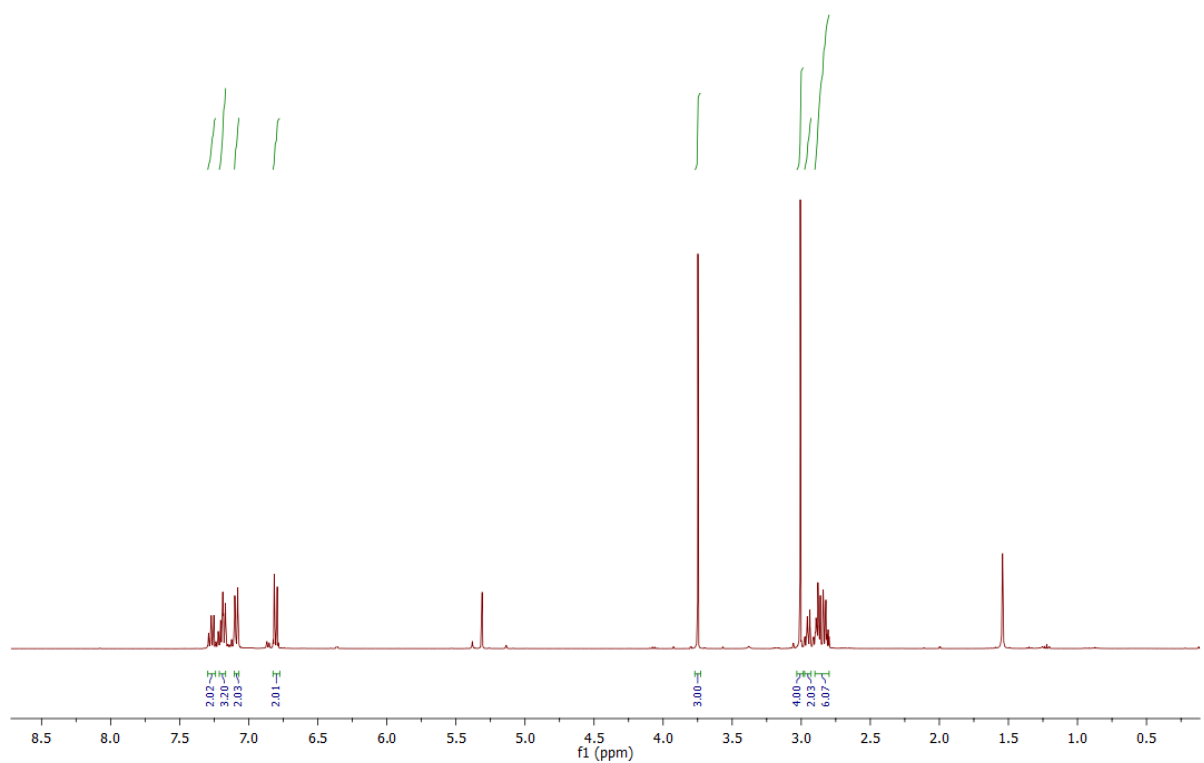

Figure 11.  $^1\text{H}$  NMR (400 MHz,  $\text{CD}_2\text{Cl}_2$ ) of **P6**. Signal at 1.50 ppm derives from water from  $\text{CD}_2\text{Cl}_2$ .

**Product P6**

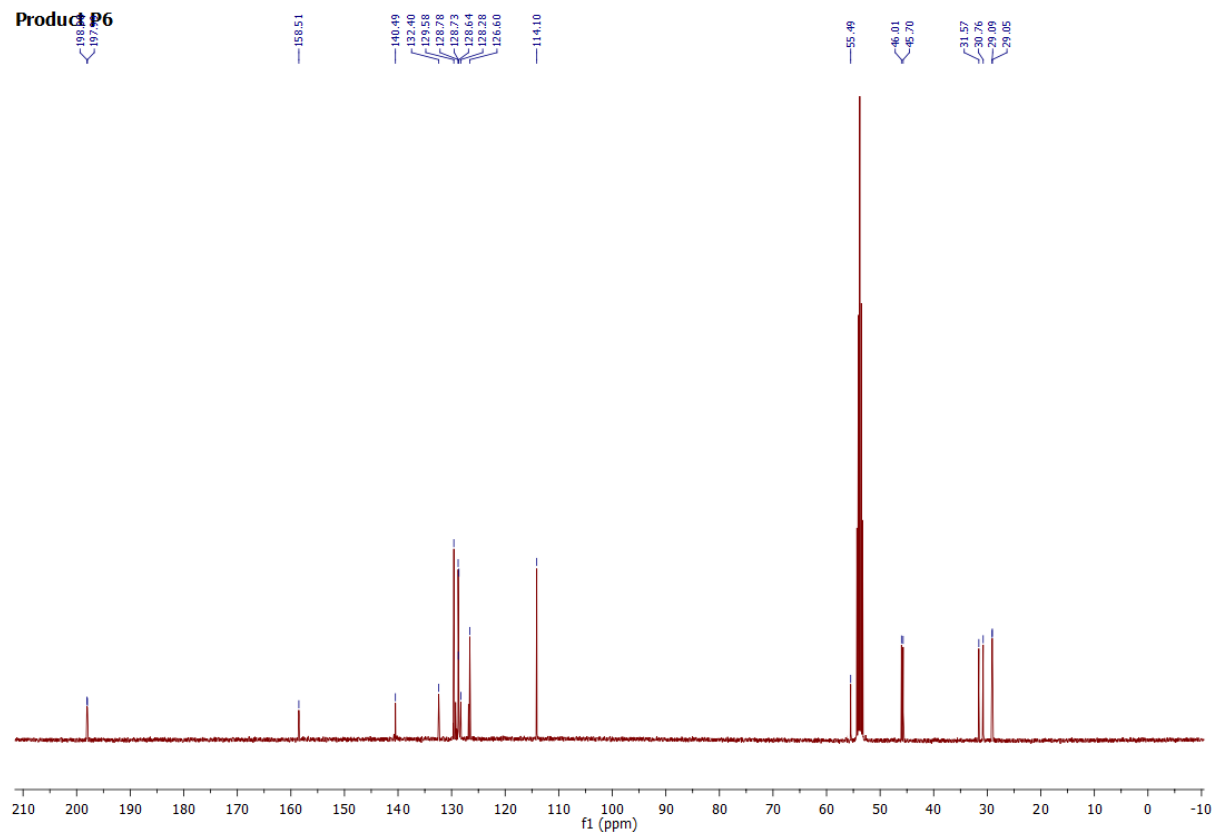

Figure 12. <sup>13</sup>C NMR (100 MHz, CD<sub>2</sub>Cl<sub>2</sub>) of **P6**

**Product P7**

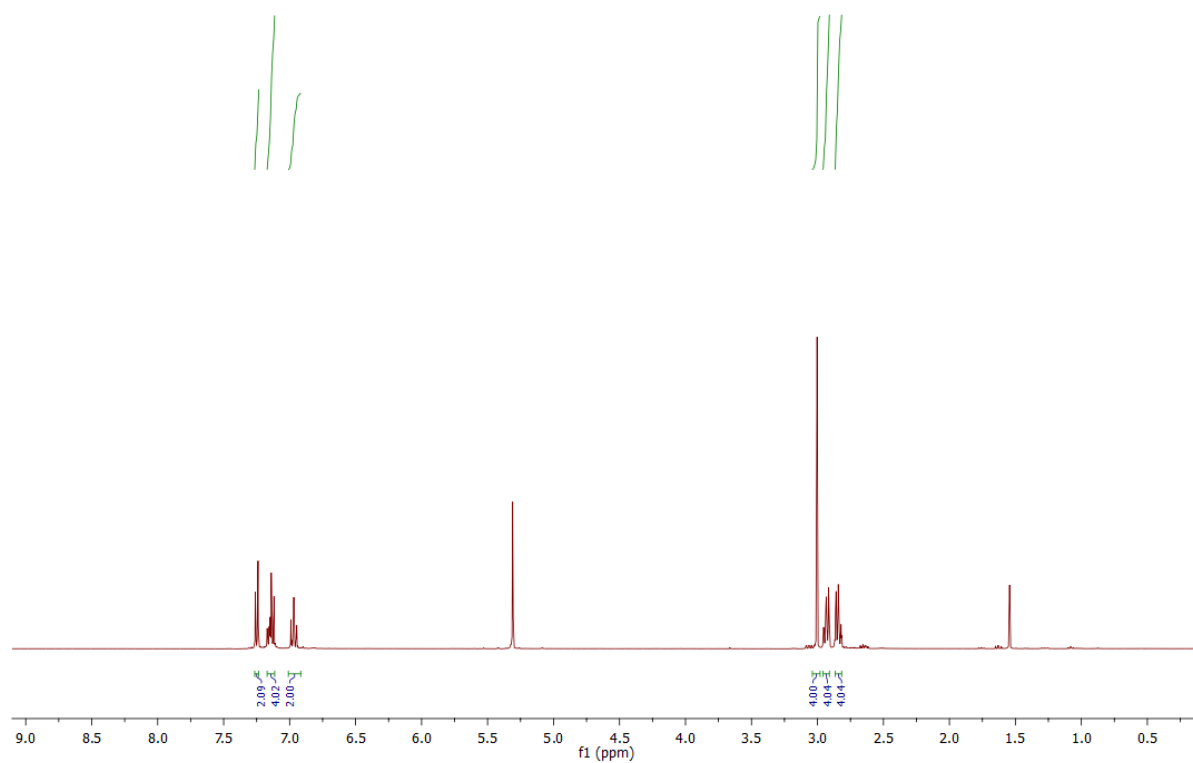

Figure 13. <sup>1</sup>H NMR (400 MHz, CD<sub>2</sub>Cl<sub>2</sub>) of **P7**

**Product P7**

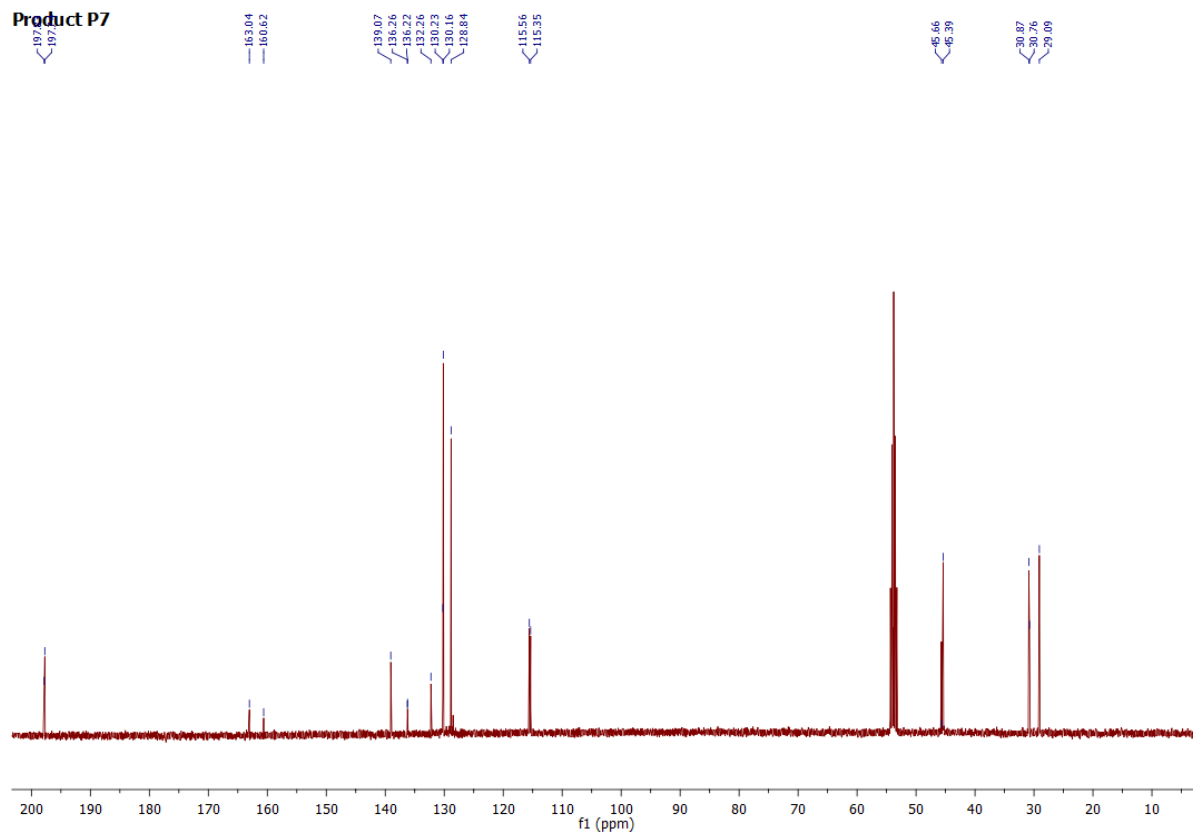

Figure 14. <sup>13</sup>C NMR (100 MHz, CD<sub>2</sub>Cl<sub>2</sub>) of **P7**

**Product P8**

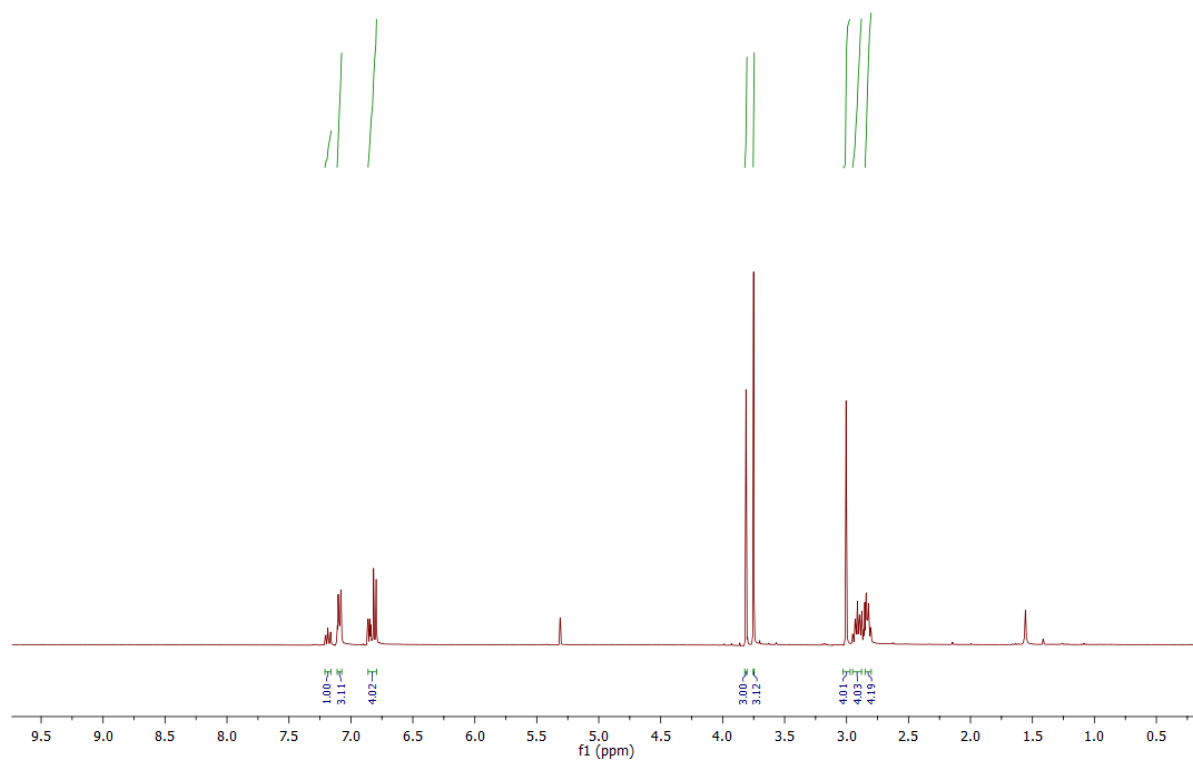

Figure 15. <sup>1</sup>H NMR (400 MHz, CD<sub>2</sub>Cl<sub>2</sub>) of **P8**. Signal at 1.50 ppm derives from water from CD<sub>2</sub>Cl<sub>2</sub>.

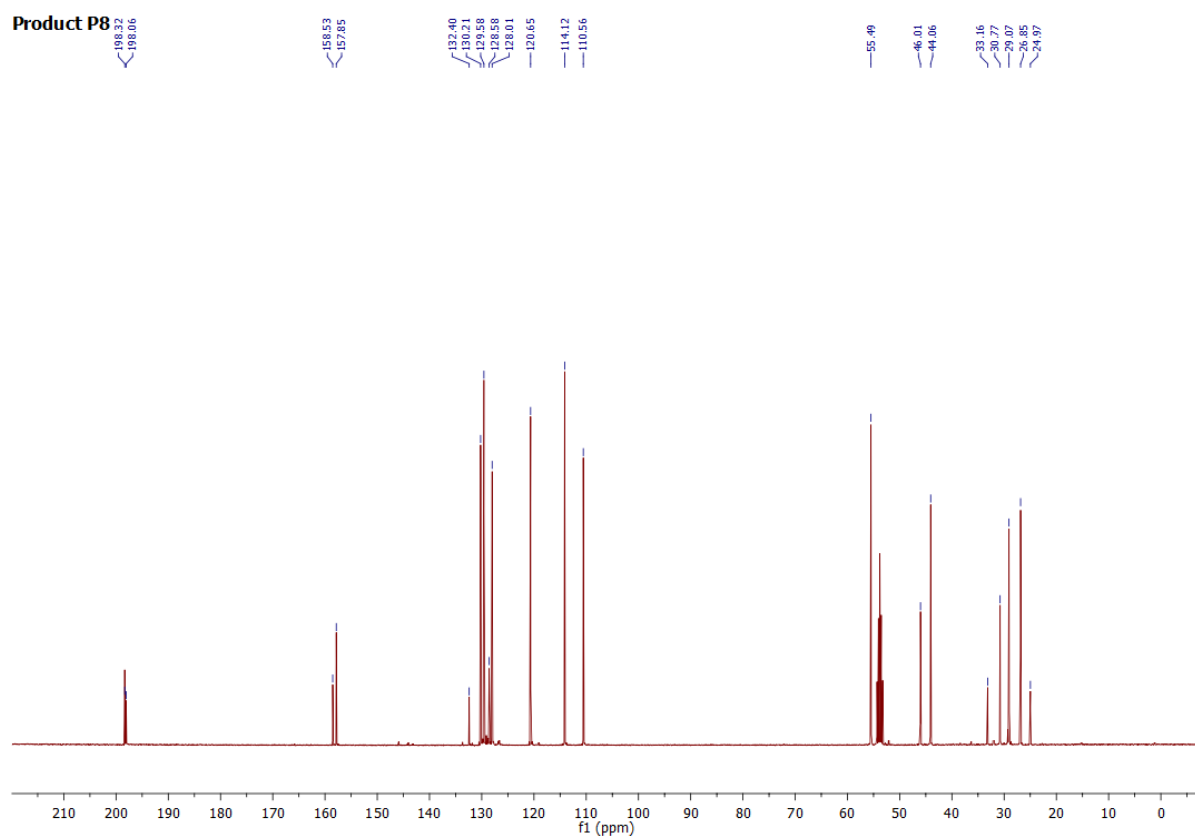

Figure 16.  $^{13}\text{C}$  NMR (100 MHz,  $\text{CD}_2\text{Cl}_2$ ) of **P8**

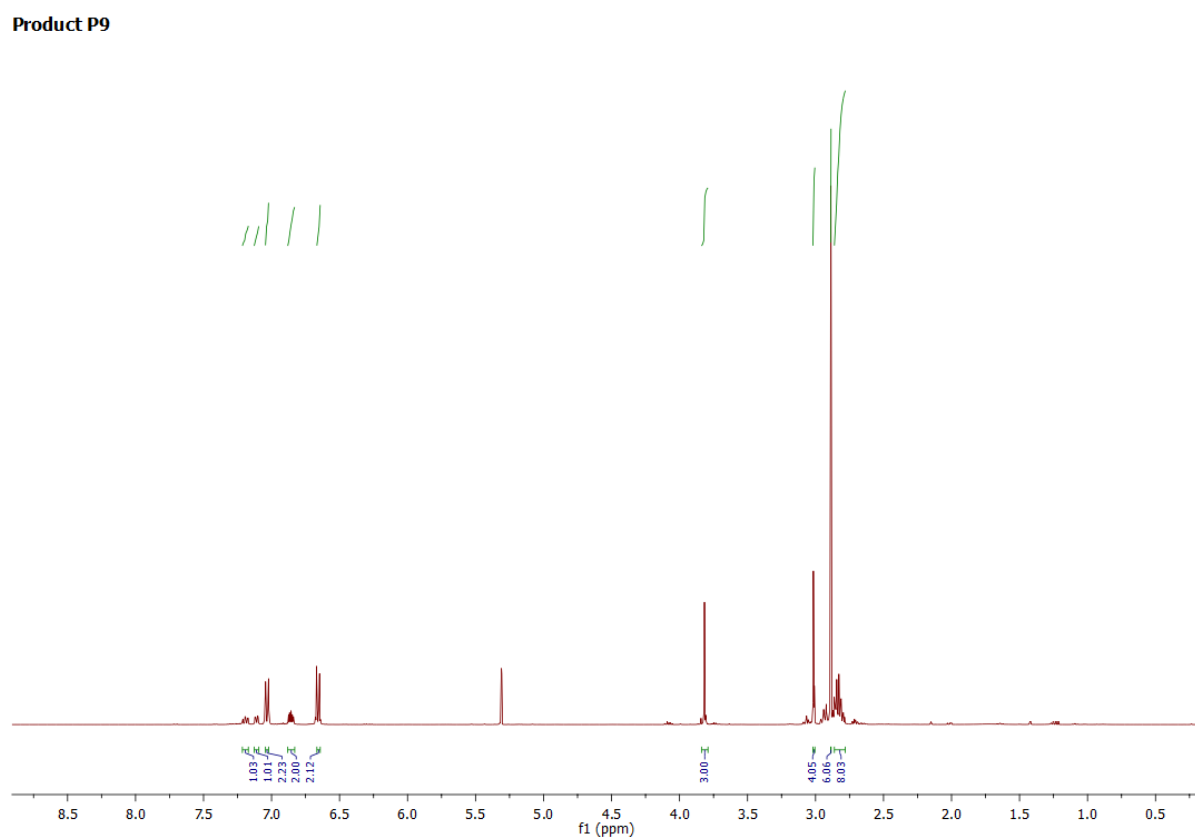

Figure 17.  $^1\text{H}$  NMR (400 MHz,  $\text{CD}_2\text{Cl}_2$ ) of **P9**

**Product P9**

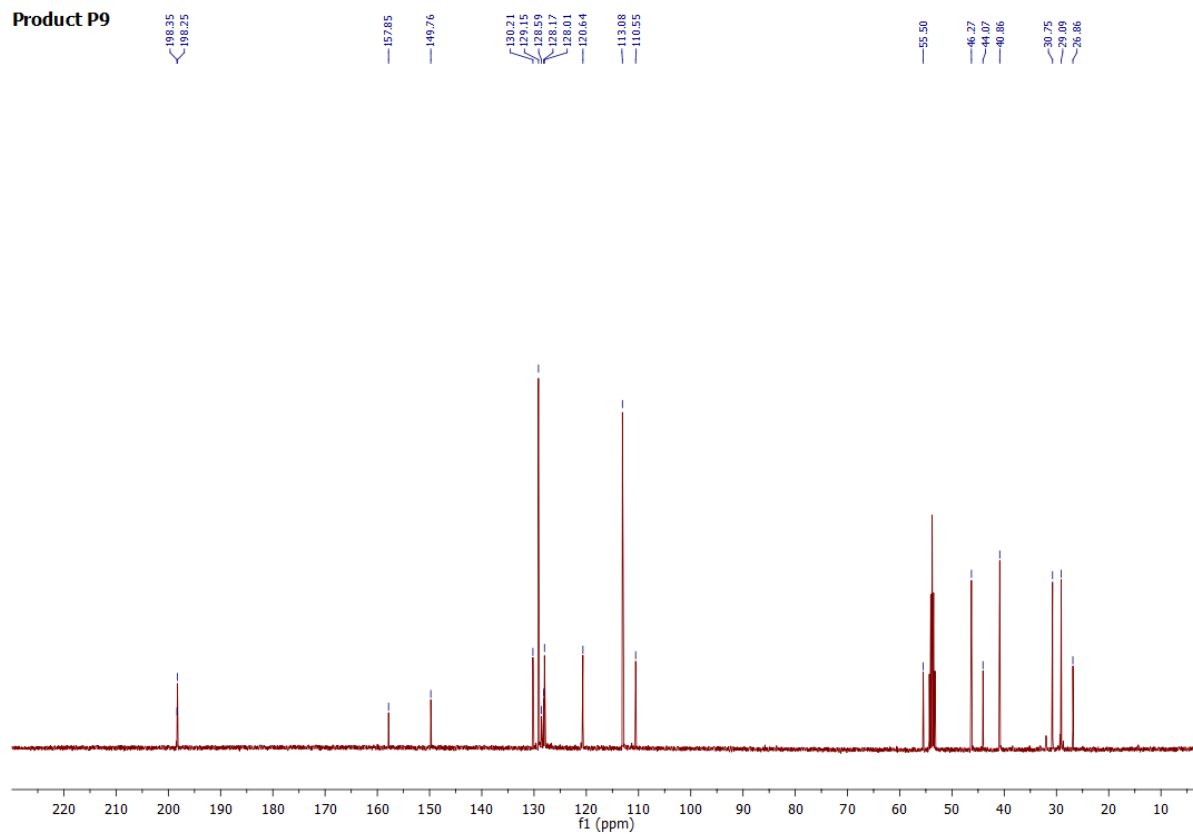

Figure 18.  $^{13}\text{C}$  NMR (100 MHz,  $\text{CD}_2\text{Cl}_2$ ) of **P9**

**Product P10**

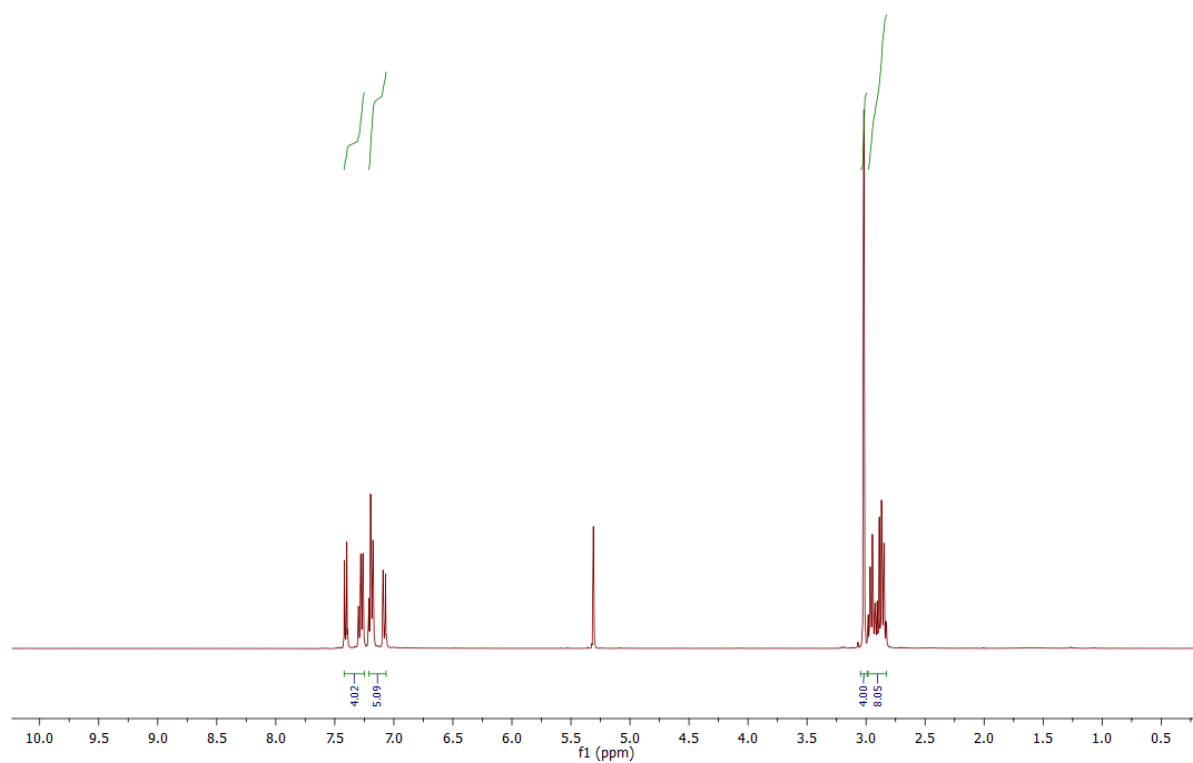

Figure 19.  $^1\text{H}$  NMR (400 MHz,  $\text{CD}_2\text{Cl}_2$ ) of **P10**

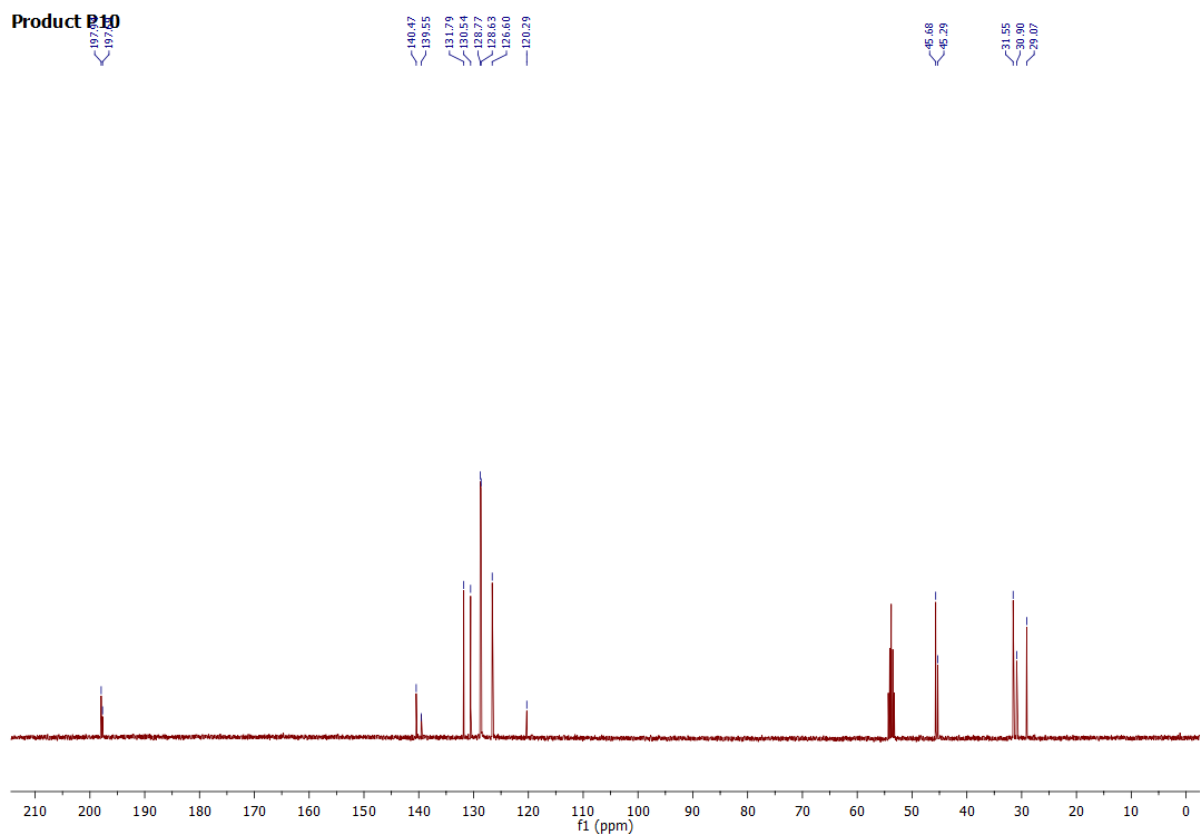

Figure 20.  $^{13}\text{C}$  NMR (100 MHz,  $\text{CD}_2\text{Cl}_2$ ) of **P10**

**Product P11**

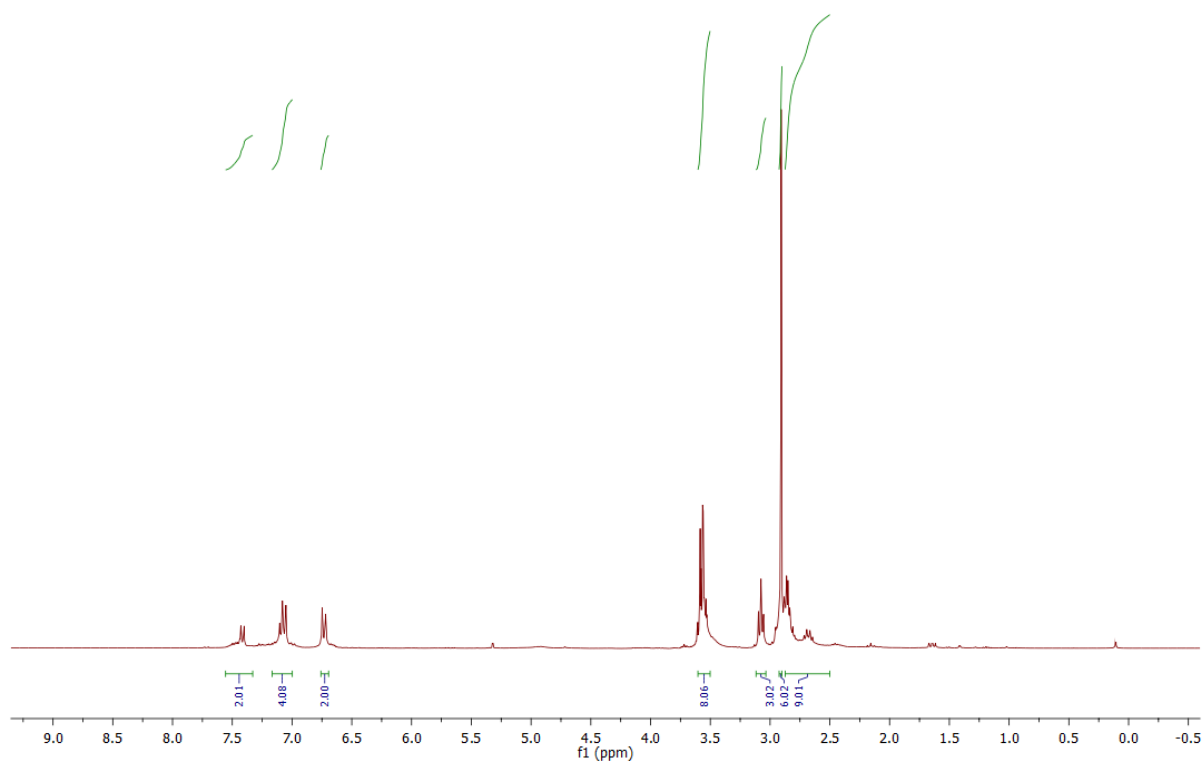

Figure 21.  $^1\text{H}$  NMR (400 MHz,  $\text{CD}_2\text{Cl}_2$ ) of **P11**

**Product P11**

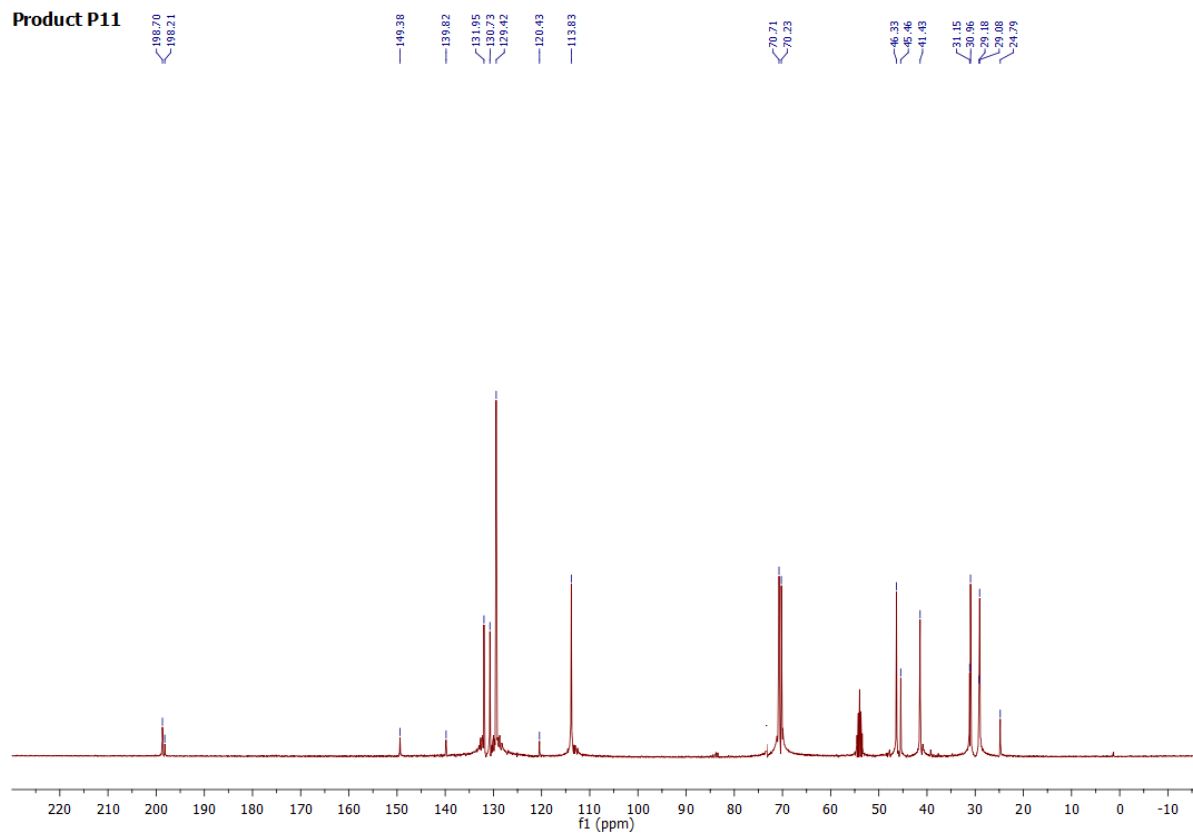

Figure 22.  $^{13}\text{C}$  NMR (100 MHz,  $\text{CD}_2\text{Cl}_2$ ) of **P11**

**Product P12**

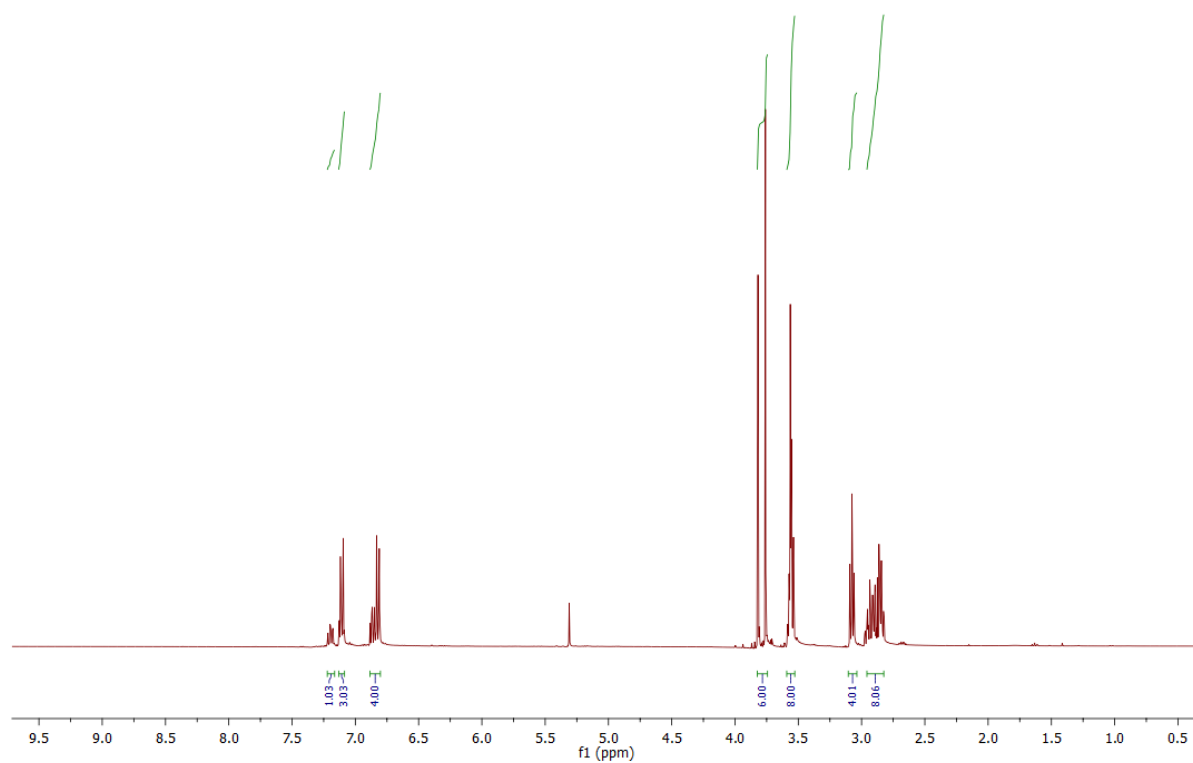

Figure 23.  $^1\text{H}$  NMR (400 MHz,  $\text{CD}_2\text{Cl}_2$ ) of **P12**

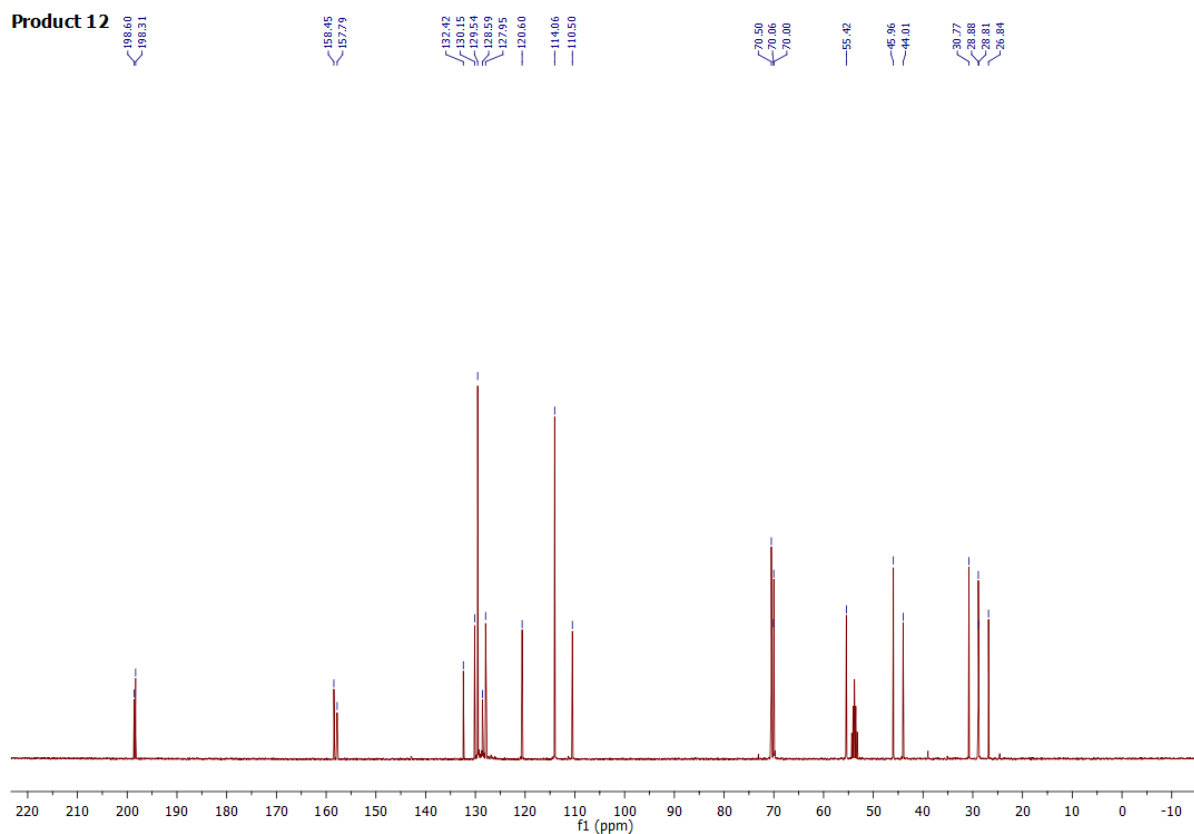

Figure 24.  $^{13}\text{C}$  NMR (100 MHz,  $\text{CD}_2\text{Cl}_2$ ) of **P12**

**Product P13**

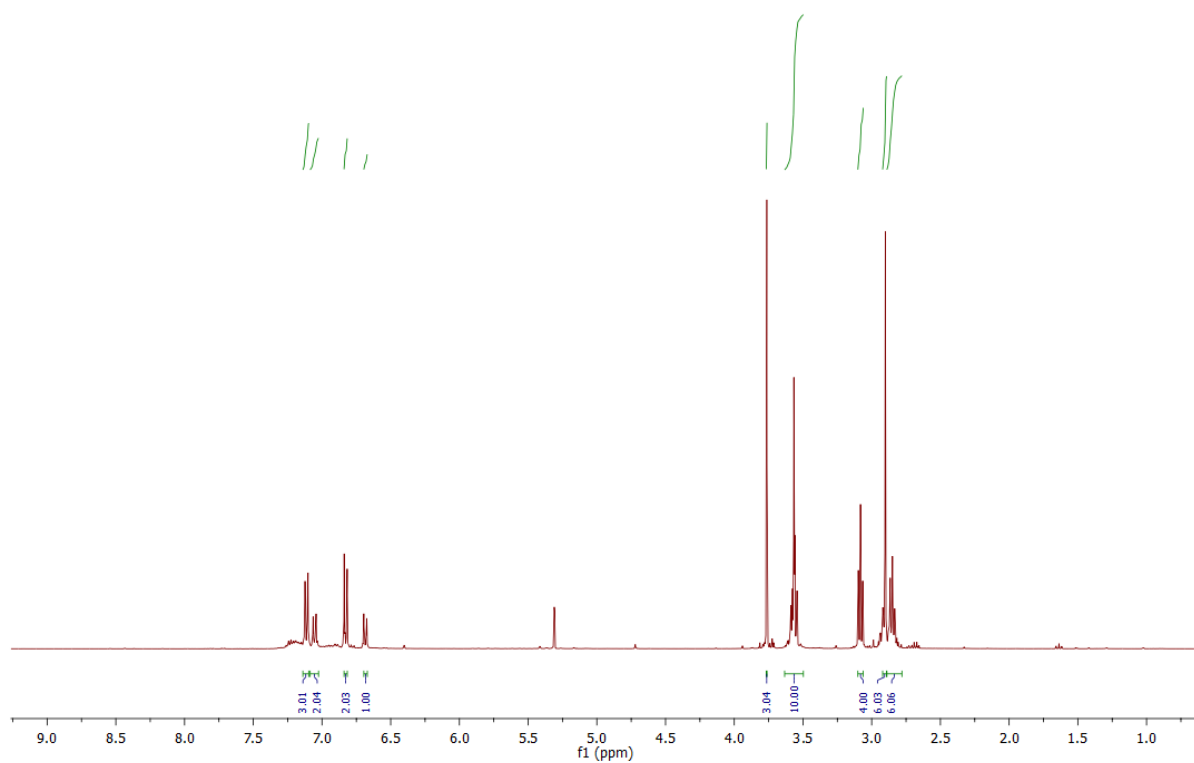

Figure 25.  $^1\text{H}$  NMR (400 MHz,  $\text{CD}_2\text{Cl}_2$ ) of **P13**

**Product P13**

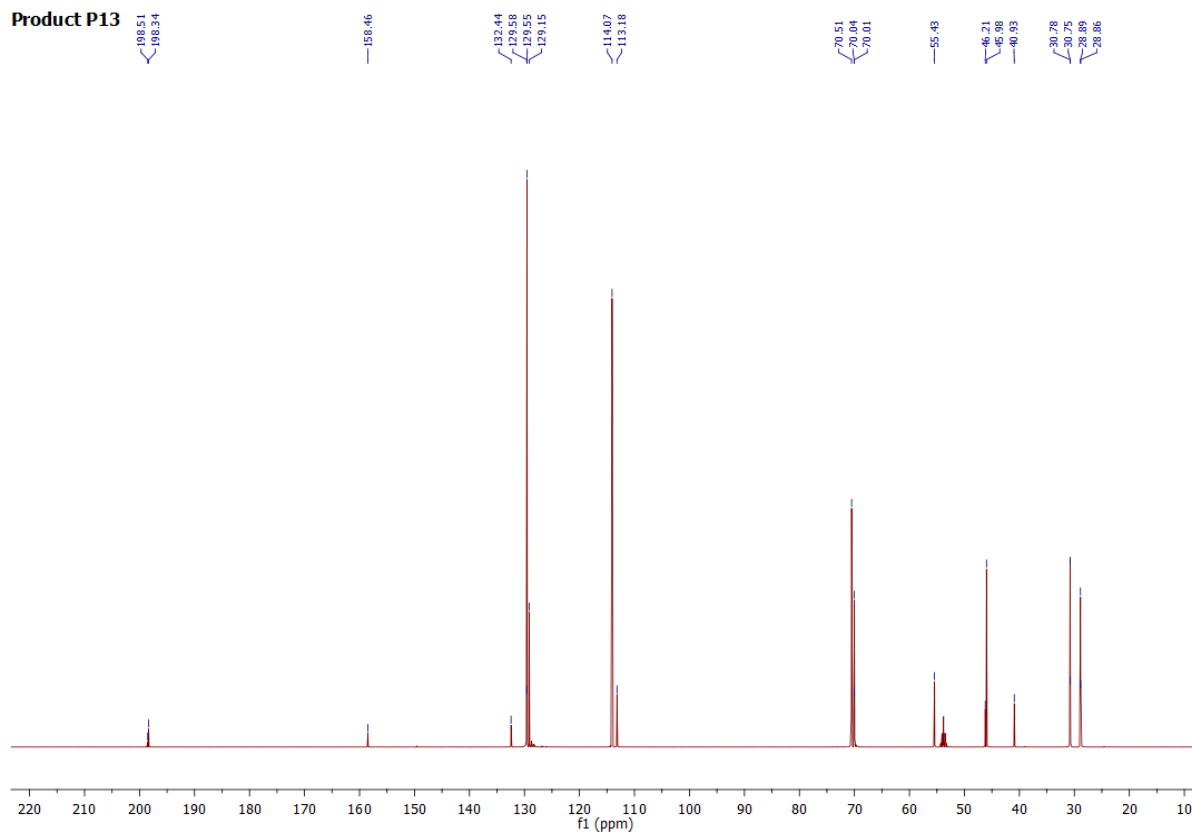

Figure 26. <sup>13</sup>C NMR (100 MHz, CD<sub>2</sub>Cl<sub>2</sub>) of **P13**

**Product P14**

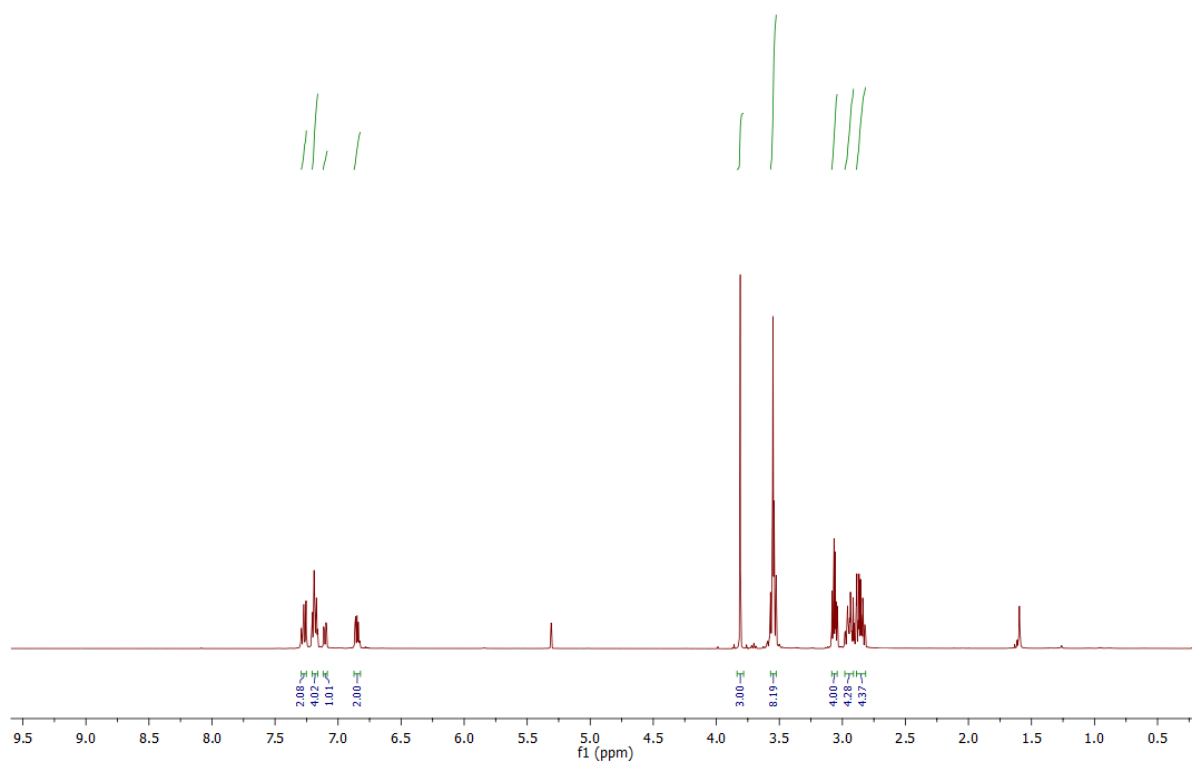

Figure 27. <sup>1</sup>H NMR (400 MHz, CD<sub>2</sub>Cl<sub>2</sub>) of **P14**

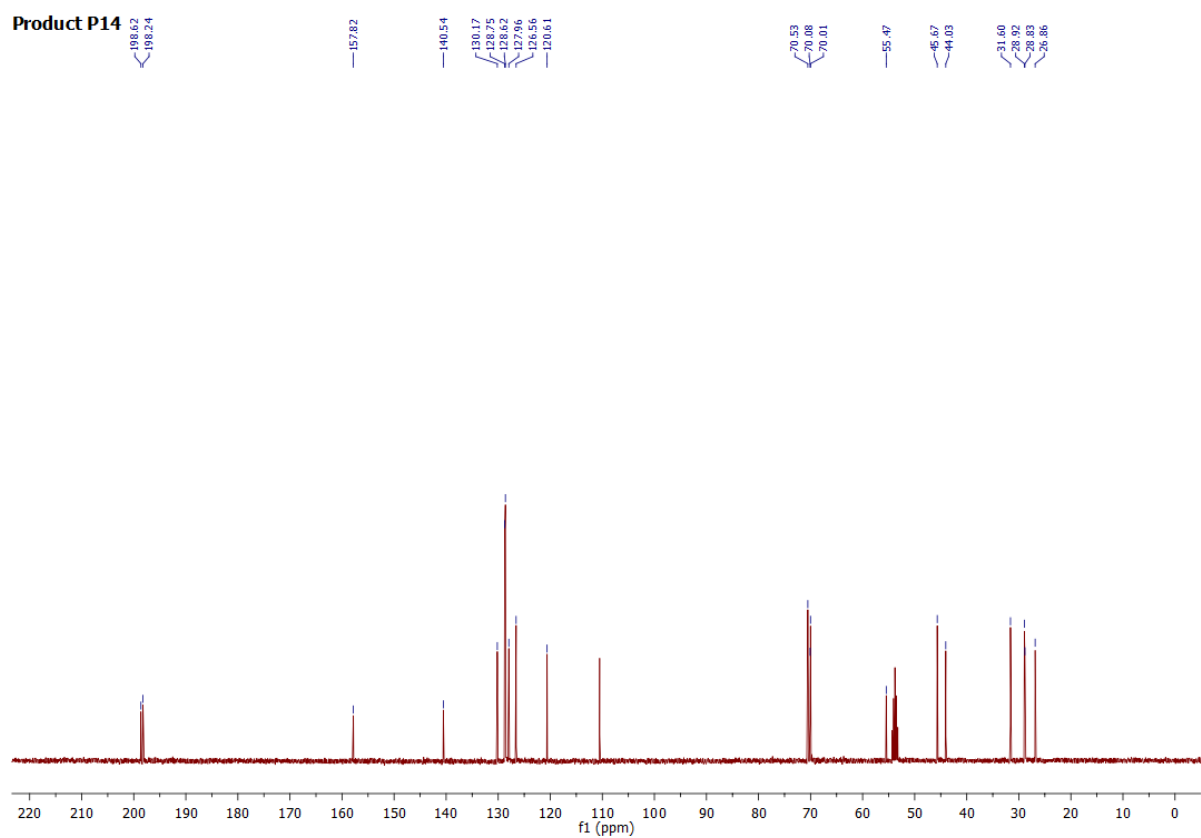

Figure 28.  $^{13}\text{C}$  NMR (100 MHz,  $\text{CD}_2\text{Cl}_2$ ) of **P14**

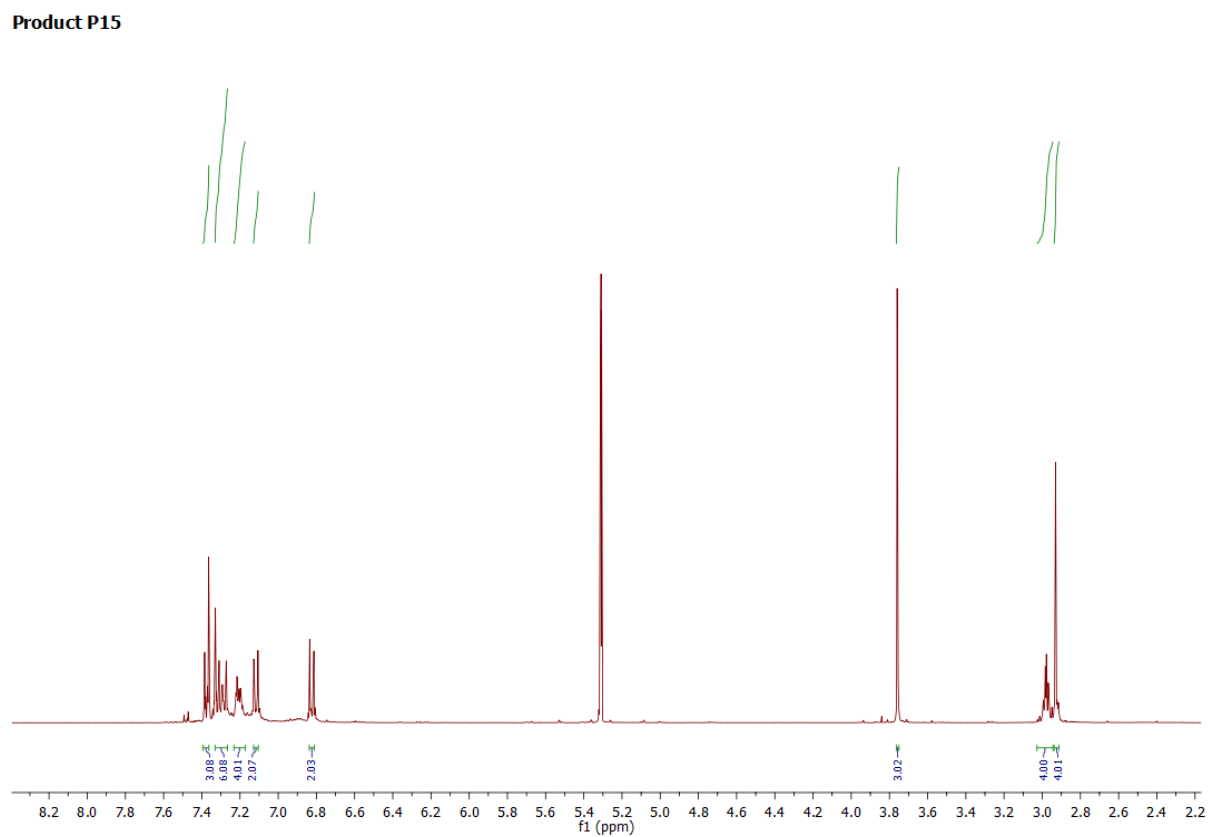

Figure 29.  $^1\text{H}$  NMR (400 MHz,  $\text{CD}_2\text{Cl}_2$ ) of **P15**

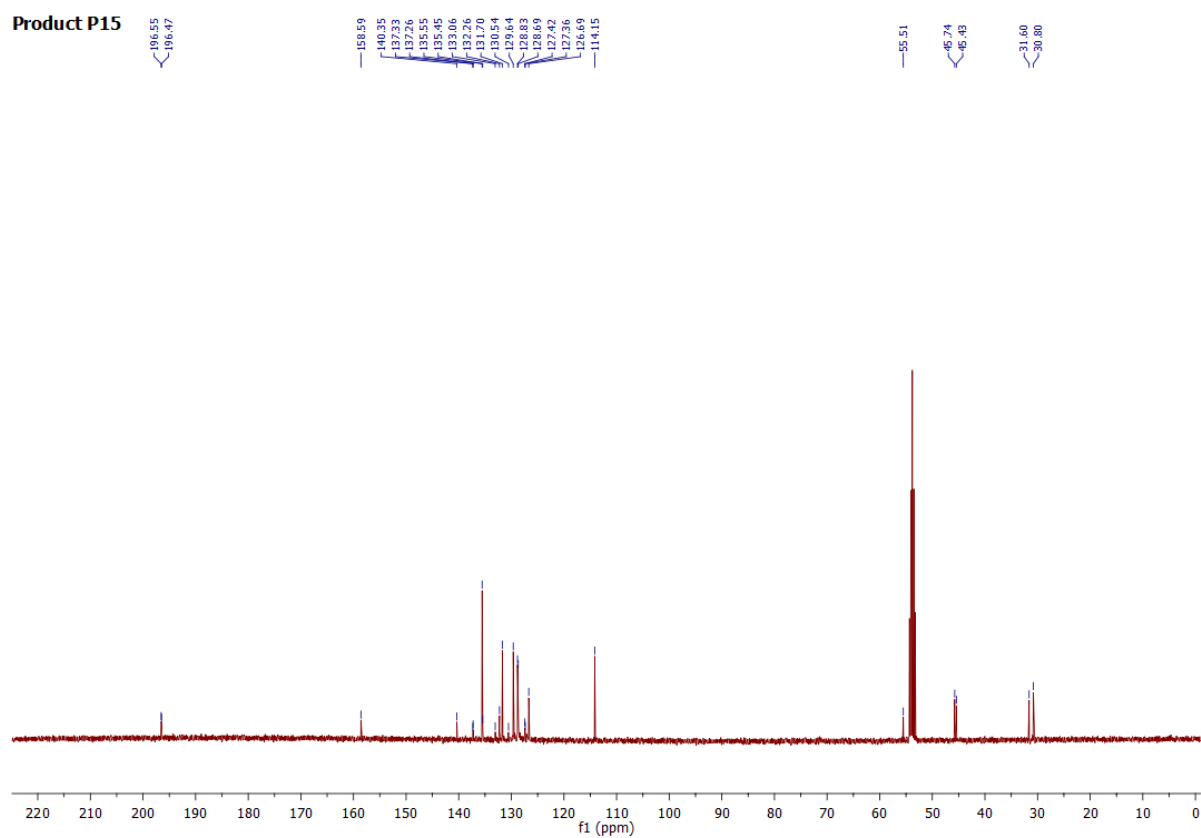

Figure 30.  $^{13}\text{C}$  NMR (100 MHz,  $\text{CD}_2\text{Cl}_2$ ) of **P15**

**Product P16**

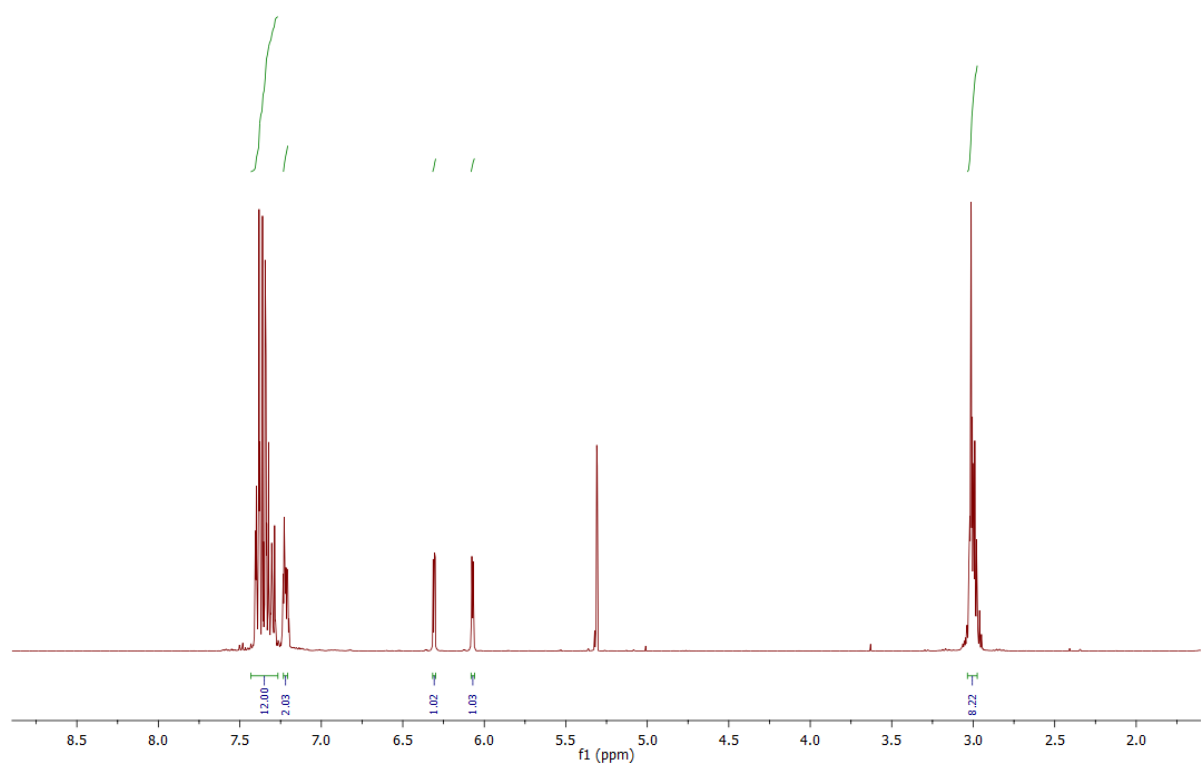

Figure 31.  $^1\text{H}$  NMR (400 MHz,  $\text{CD}_2\text{Cl}_2$ ) of **P16**

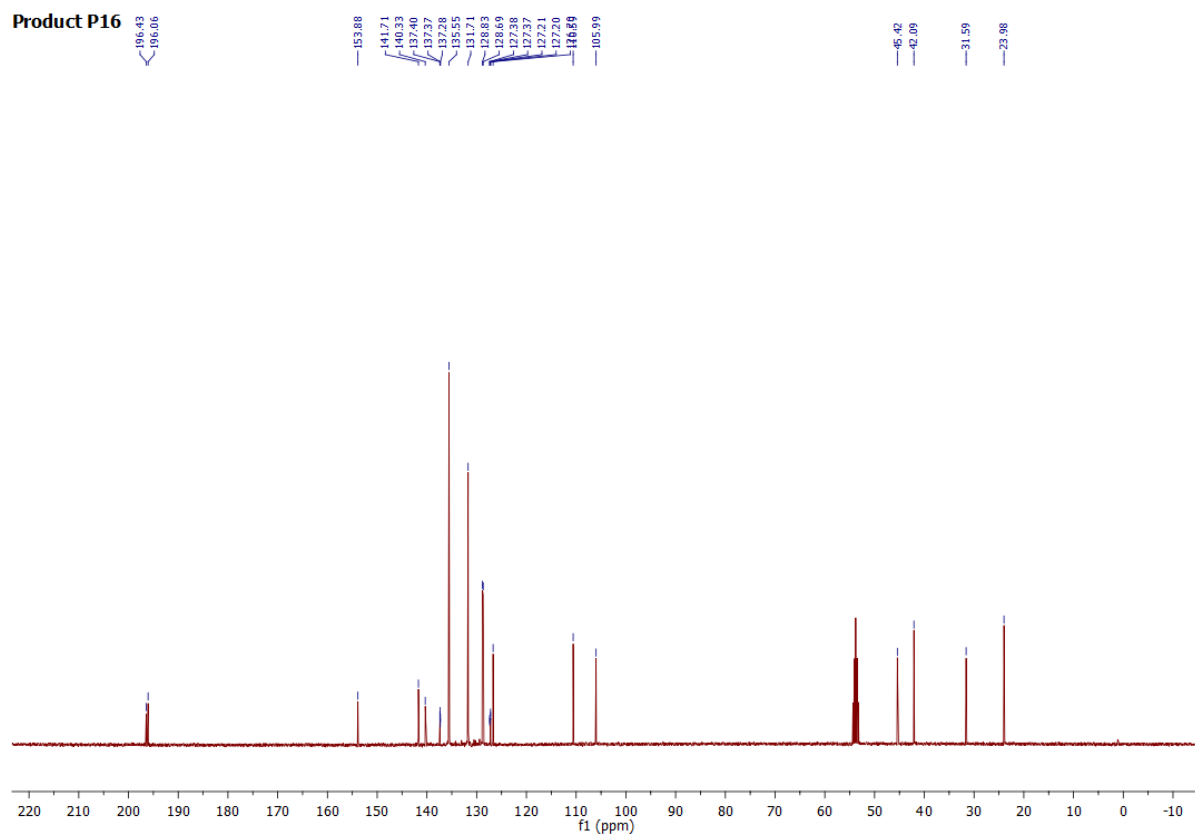

Figure 32.  $^{13}\text{C}$  NMR (100 MHz,  $\text{CD}_2\text{Cl}_2$ ) of **P16**

**Product P17**

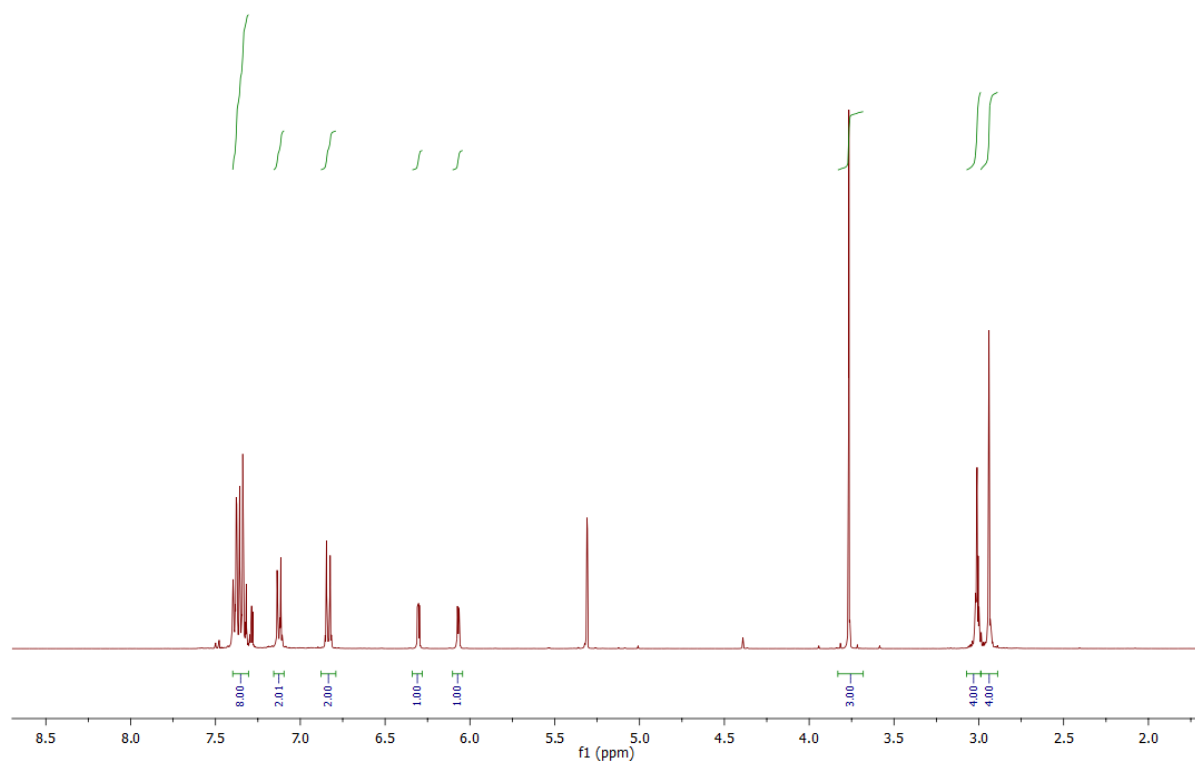

Figure 35.  $^1\text{H}$  NMR (400 MHz,  $\text{CD}_2\text{Cl}_2$ ) of **P17**

**Product P17**

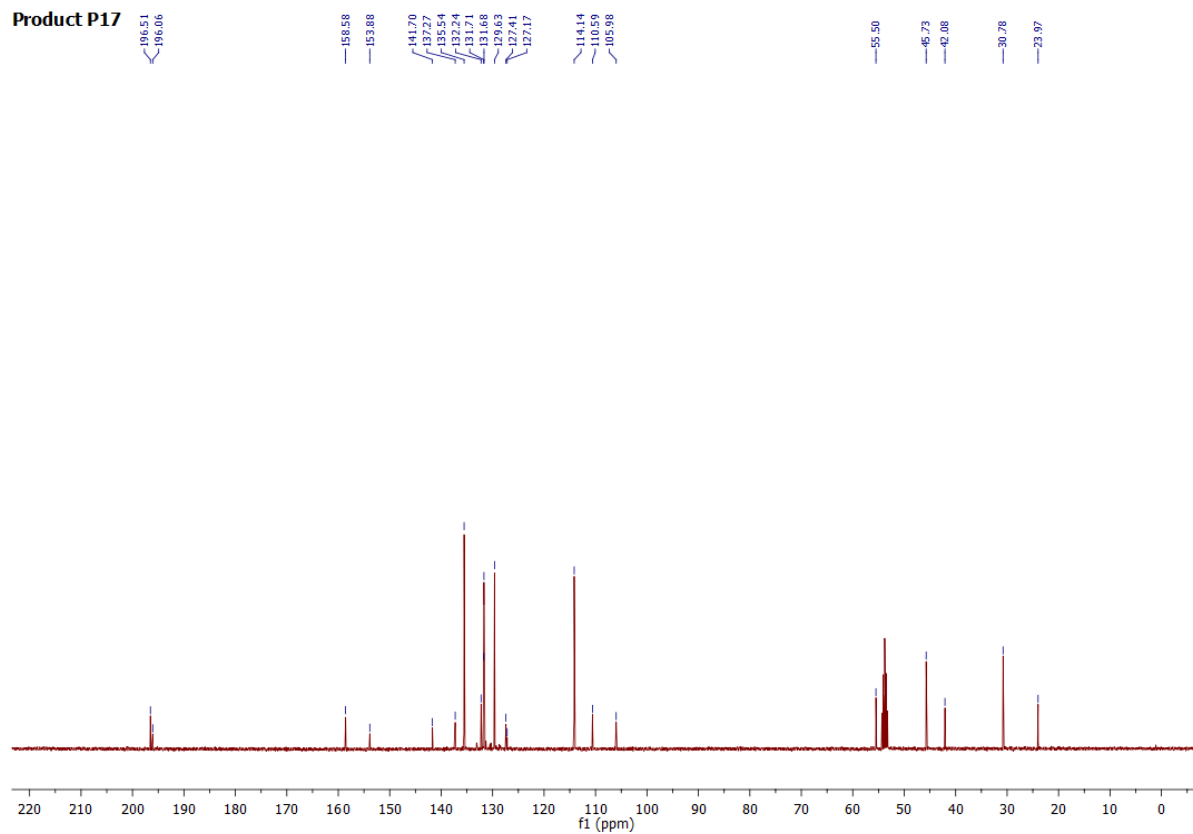

Figure 36. <sup>13</sup>C NMR (100 MHz, CD<sub>2</sub>Cl<sub>2</sub>) of **P17**

## 6. References

- <sup>1</sup> M. Hans, J. Lorkowski, A. Demonceau, L. Delaude, *Beilstein J. Org. Chem.*, 2015, **11**, 2318–2325.
